# Supplementary material for: Synthesis and biological evaluation of novel hybrid compounds bearing pyrazine and 1,2,4-triazole analogues as potent antitubercular agents
Source: Royal Society of Chemistry journal article supplement (doi:10.1039/d3pm00054k), 2024-01-01
Supplement: d3pm00054k1.pdf [file d3pm00054k1.pdf]

# **Synthesis and Biological Evaluation of Novel Hybrid Compounds Bearing Pyrazine and 1,2,4-triazole Analogues as Potent Antitubercular Agents**

**Shivakumar<sup>1</sup>, Dinesha P<sup>1</sup>, Vanishree A. L.<sup>1</sup>, Udayakumar D.<sup>1\*</sup>, Varsha Prakash Shetty<sup>2</sup>,  
Chaithra Prabhu<sup>2</sup>, Vijaya Kumar Deekshit<sup>2</sup>**

<sup>1</sup>Organic and Medicinal Chemistry Laboratory, Department of Chemistry, National Institute of  
Technology Karnataka, Surathkal-575025, Mangalore, Karnataka, India

<sup>2</sup>Division of Infectious Diseases, Nitte University Center for Science Education and Research,  
Nitte (Deemed to be University), Deralakatte-575018, Mangalore, Karnataka, India

\*Corresponding author: [udayakumar@nitk.edu.in](mailto:udayakumar@nitk.edu.in), [udayaravi80@gmail.com](mailto:udayaravi80@gmail.com)

## **Supporting information**

### **Contents:**

01. Copies of <sup>1</sup>H-NMR spectra of the target compounds.
02. Copies of <sup>13</sup>C-NMR spectra of the target compounds.
03. Copies of ESI-MASS spectra of the target compounds.
04. Invitro antitubercular activity studies of the target compounds.
05. Cytotoxicity studies of the active compounds.

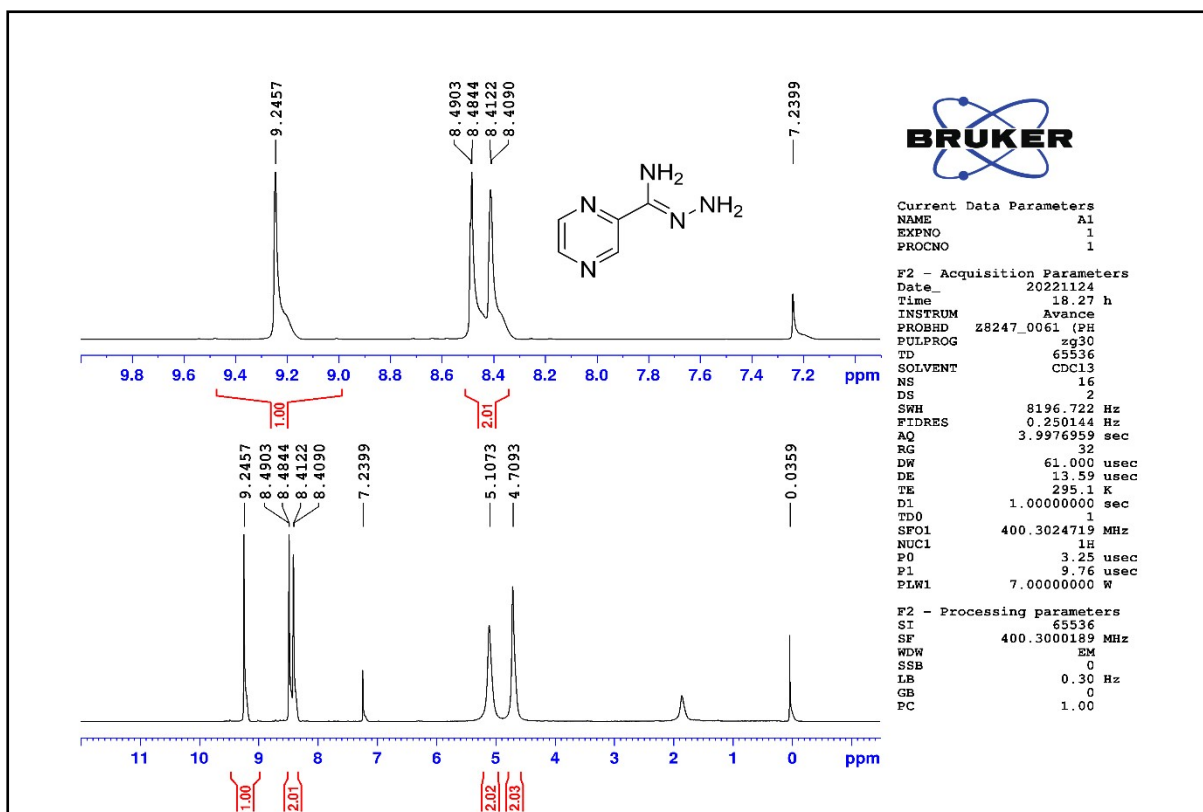

Figure S1: <sup>1</sup>H-NMR spectrum of compound 2

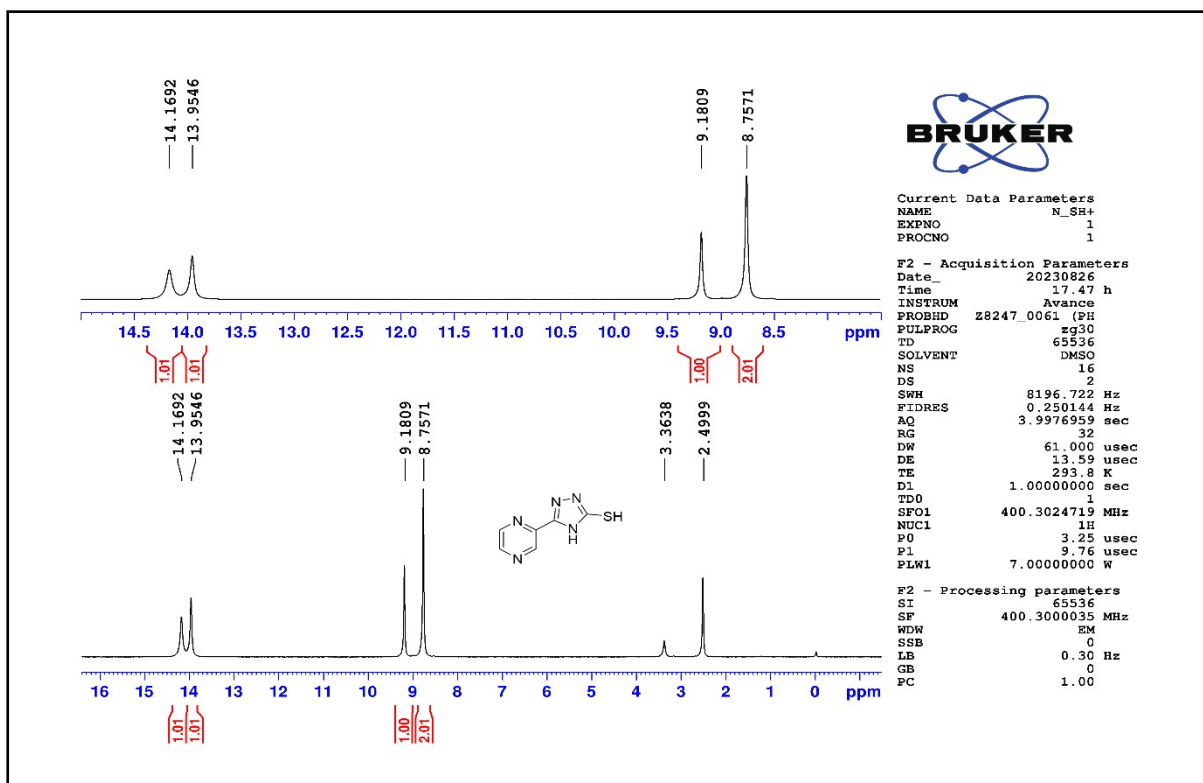

Figure S2: <sup>1</sup>H-NMR spectrum of compound 3

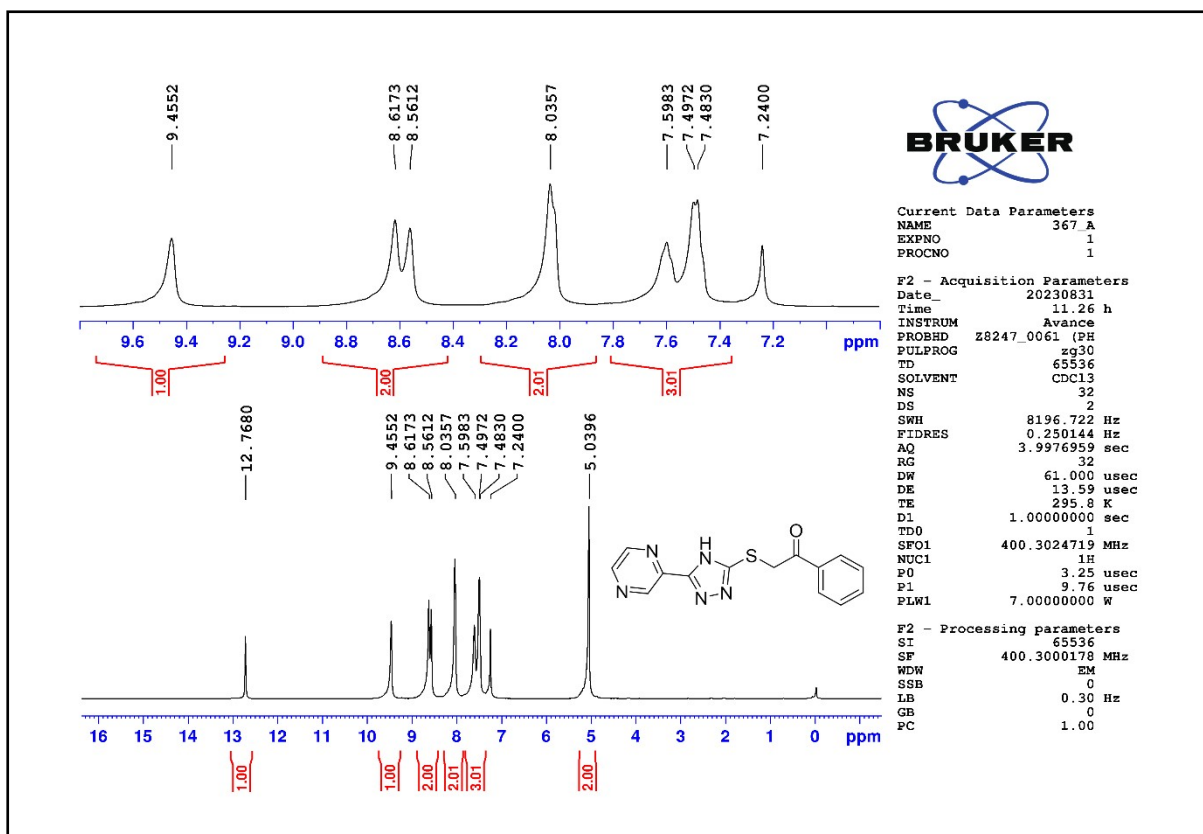

Figure S3: <sup>1</sup>H-NMR spectrum of compound T1

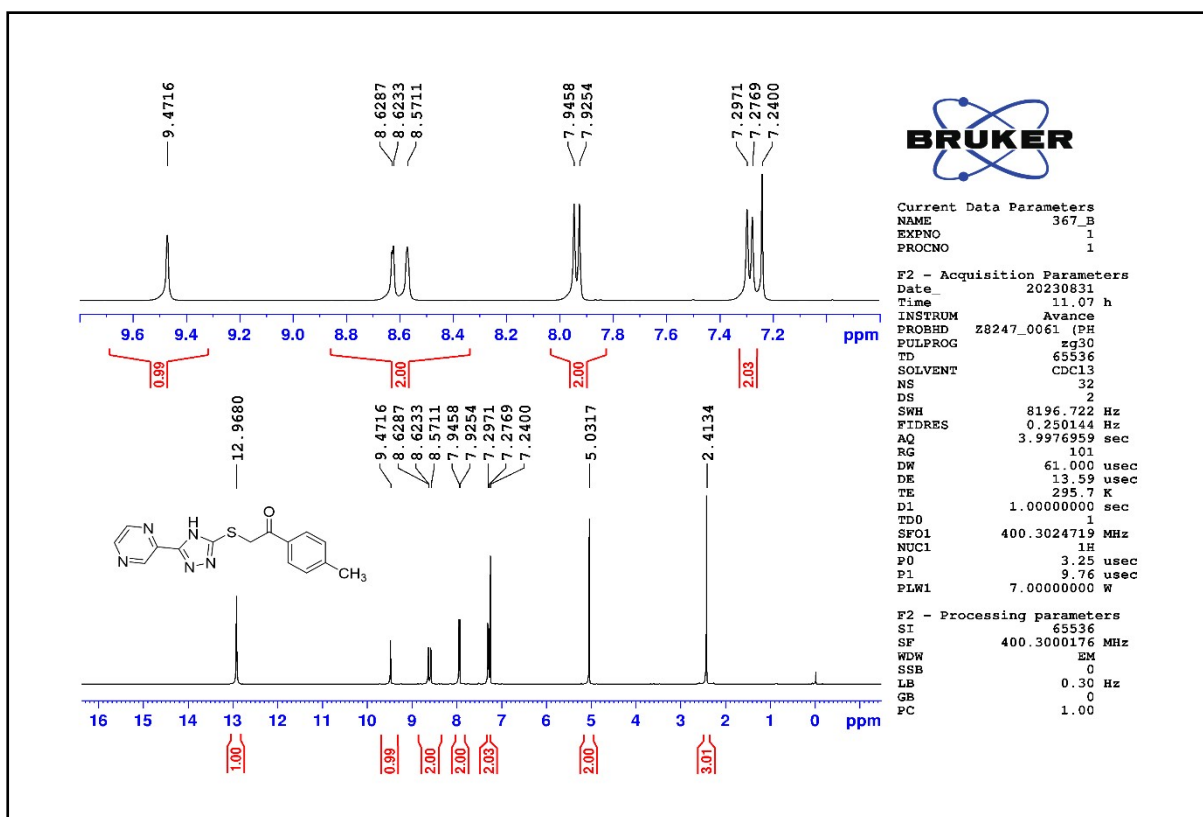

Figure S4: <sup>1</sup>H-NMR spectrum of compound T2

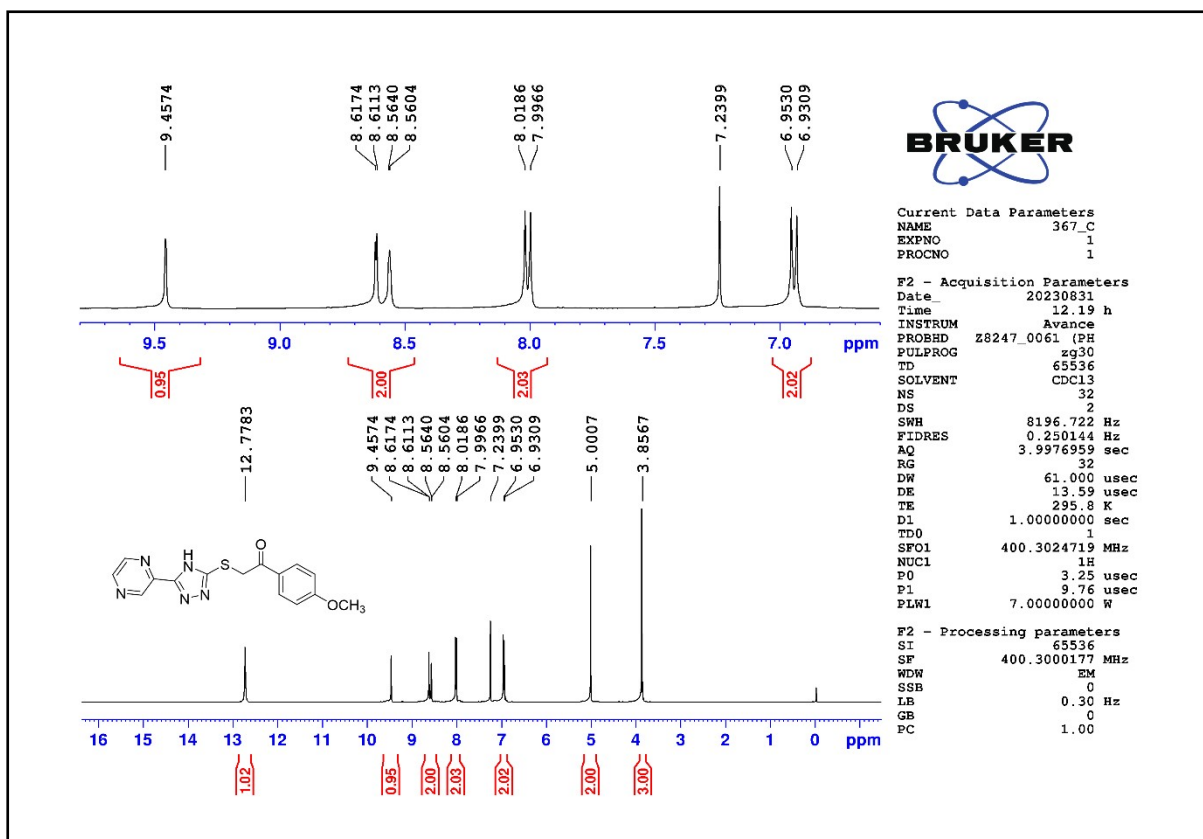

Figure S5: <sup>1</sup>H-NMR spectrum of compound T3

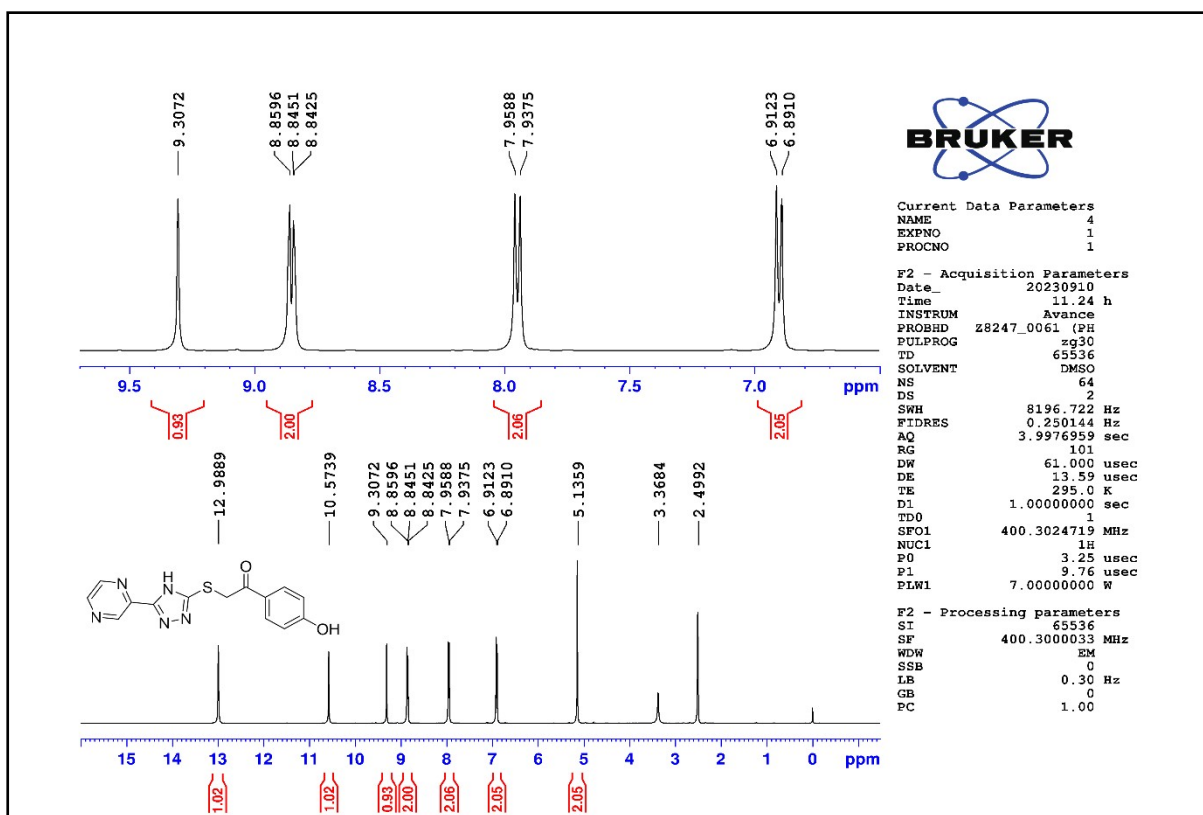

Figure S6: <sup>1</sup>H-NMR spectrum of compound T4



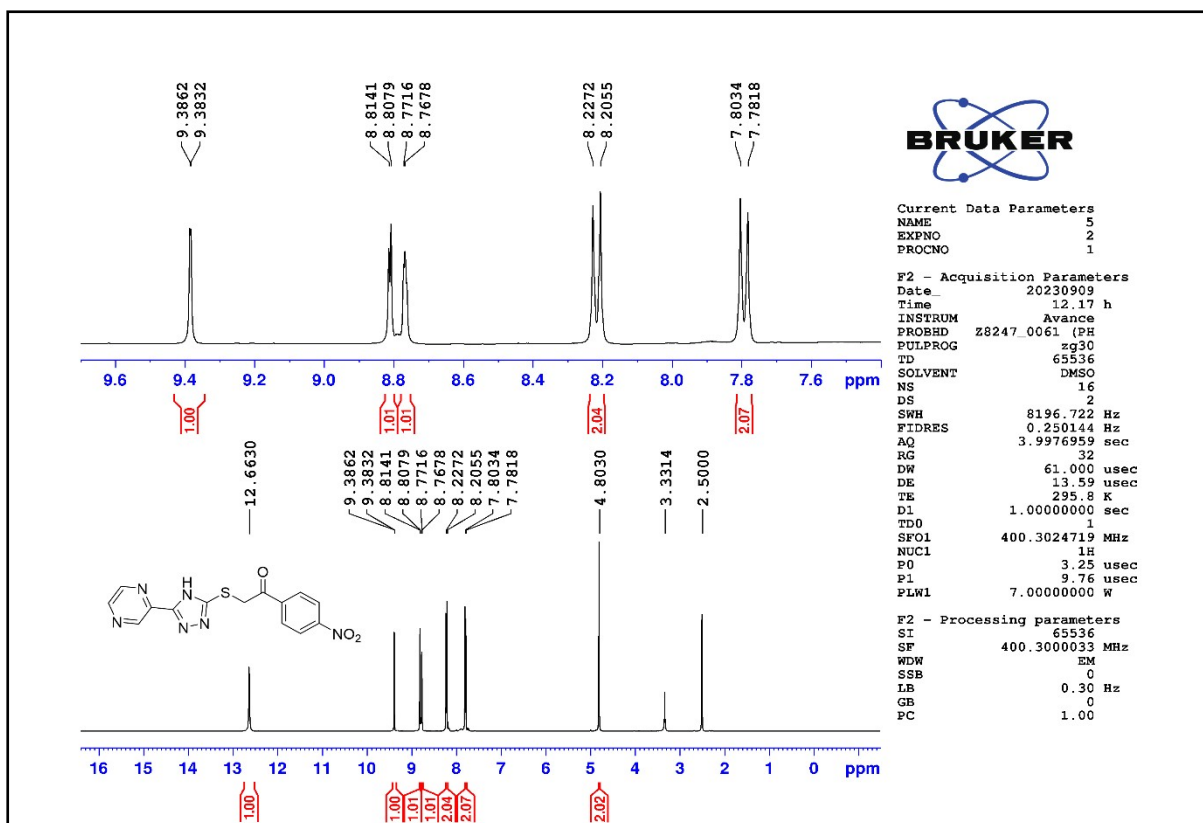

Figure S7: <sup>1</sup>H-NMR spectrum of compound T5

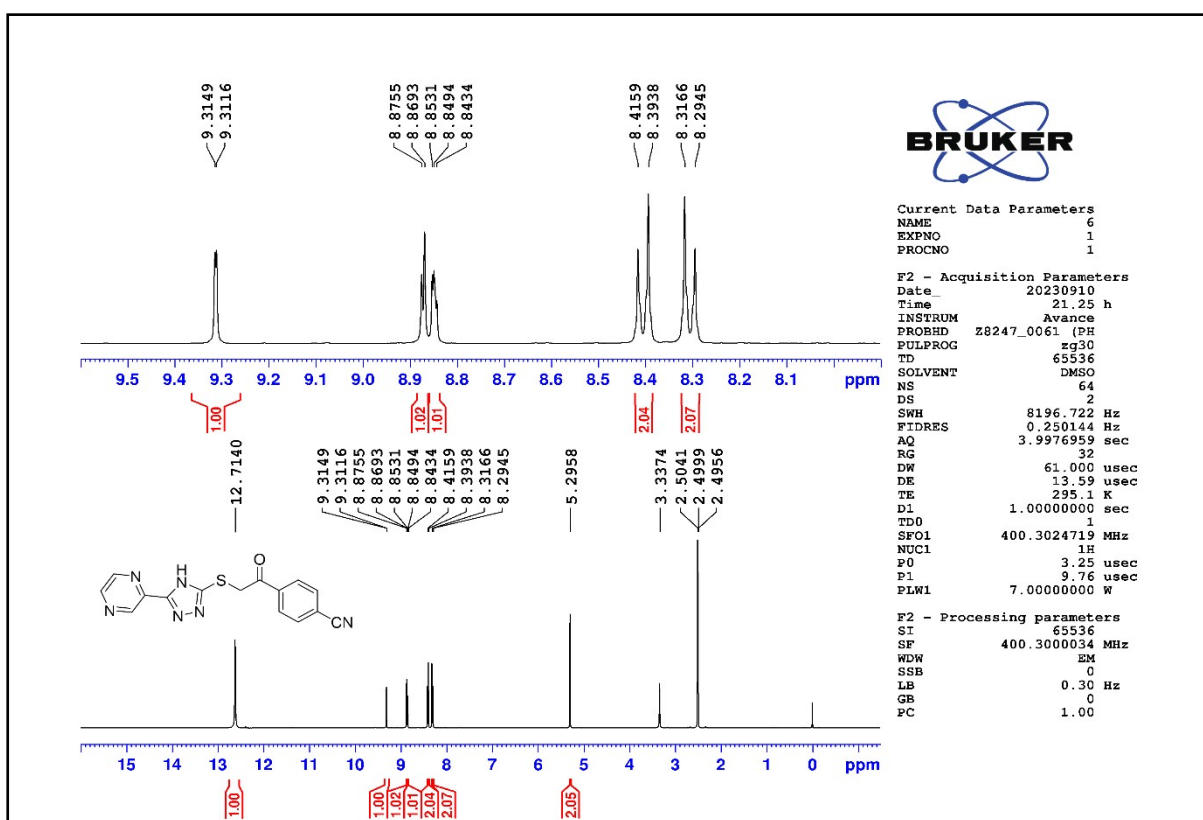

Figure S8: <sup>1</sup>H-NMR spectrum of compound T6

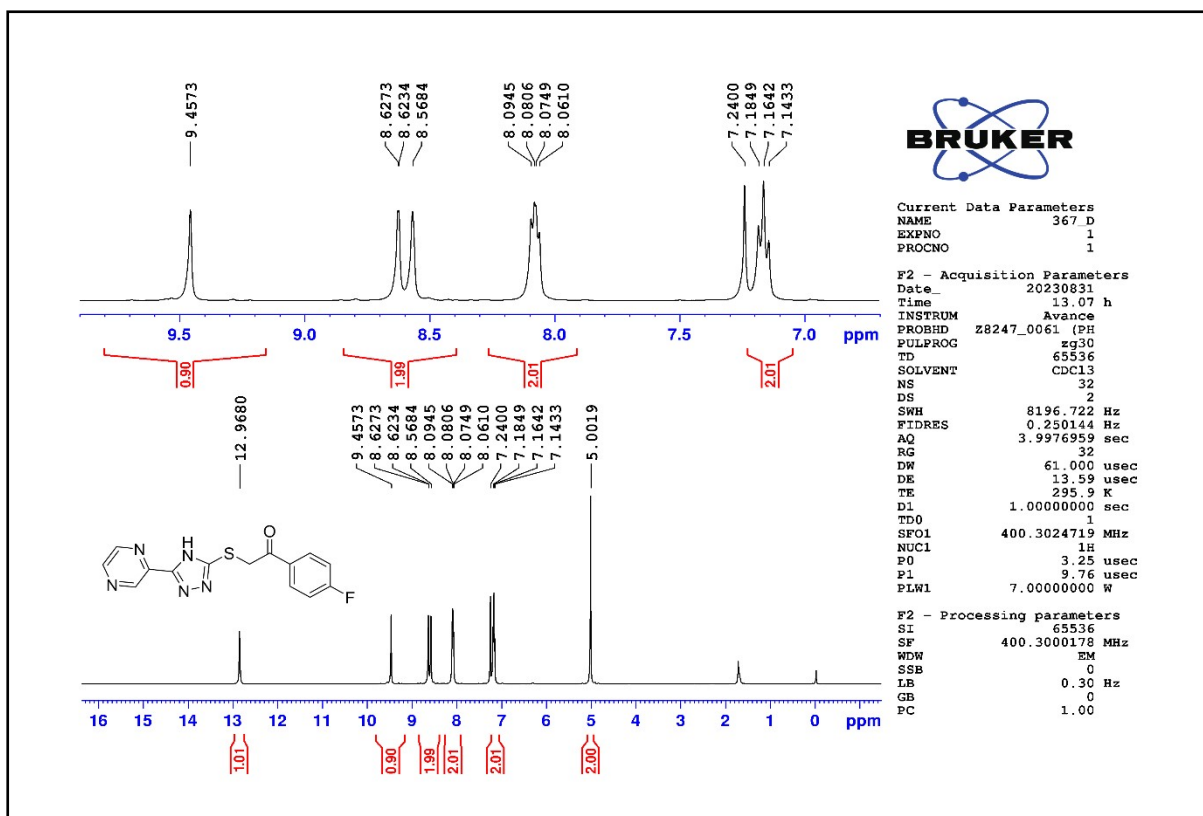

Figure S9: <sup>1</sup>H-NMR spectrum of compound T7

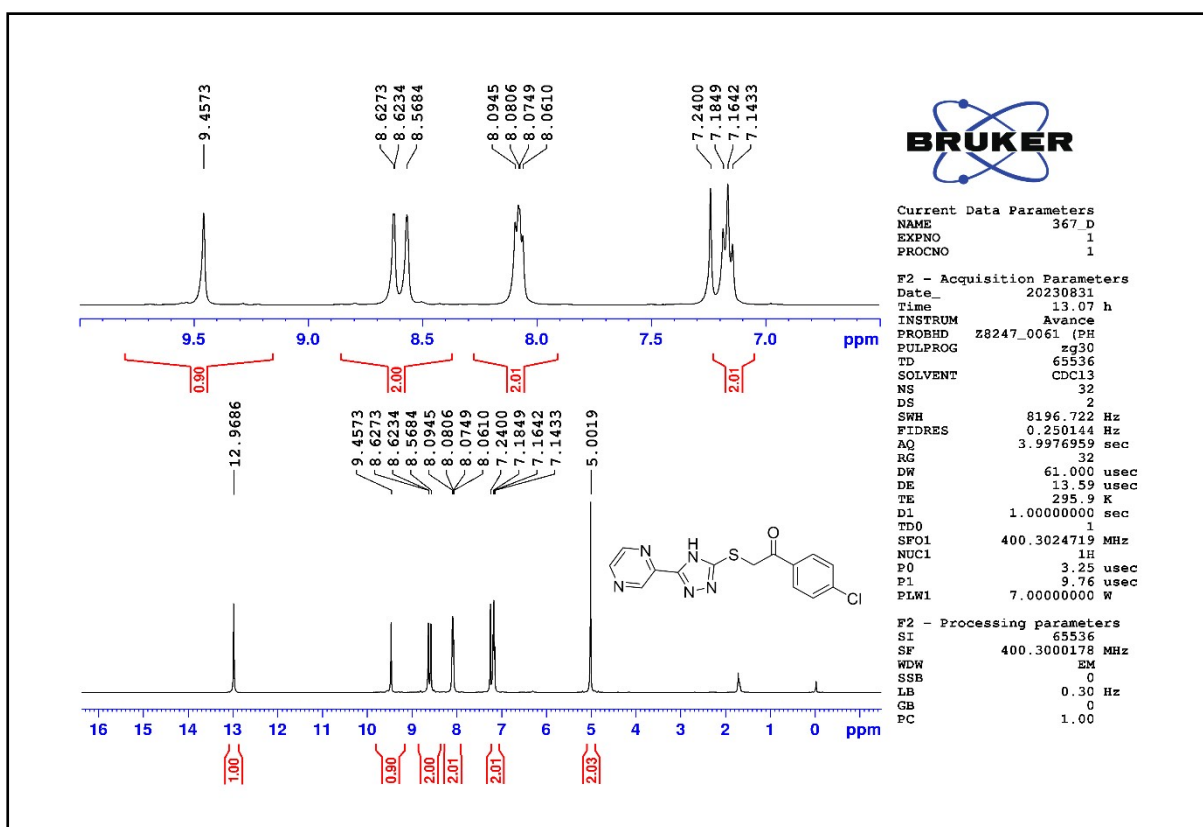

Figure S10: <sup>1</sup>H-NMR spectrum of compound T8

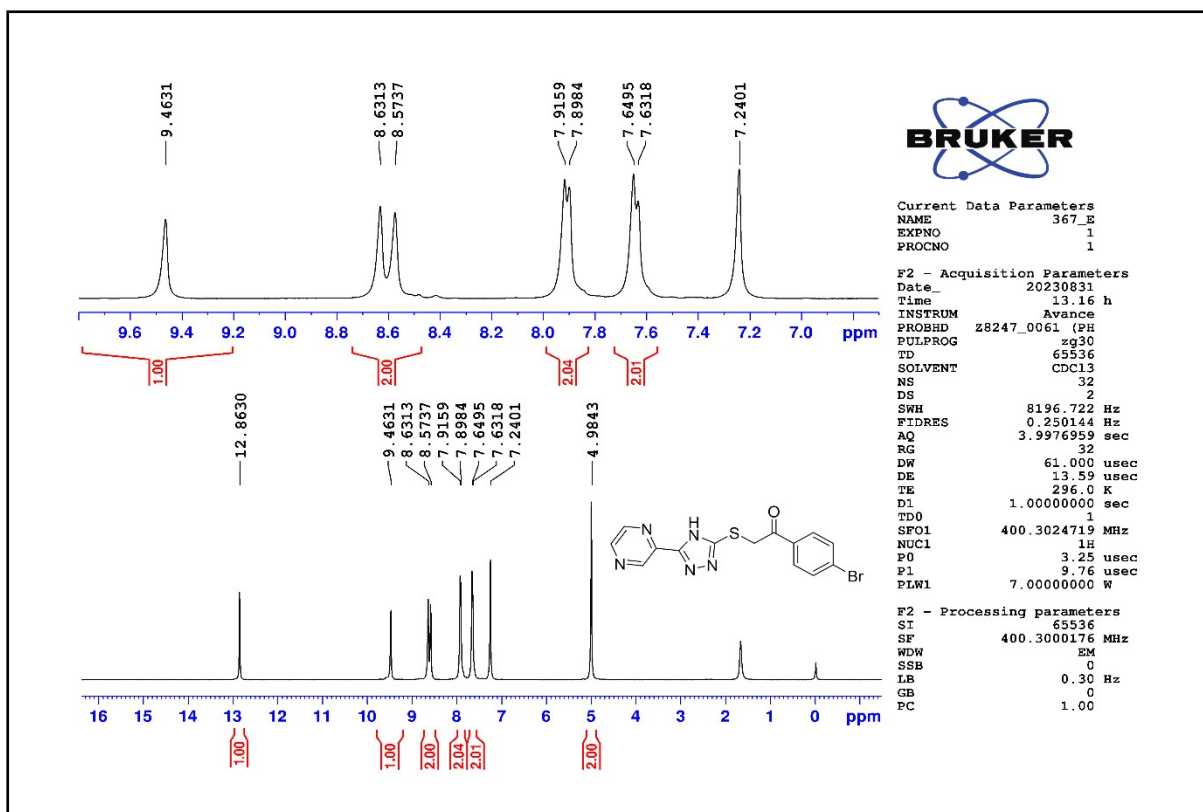

Figure S11: <sup>1</sup>H-NMR spectrum of compound T9

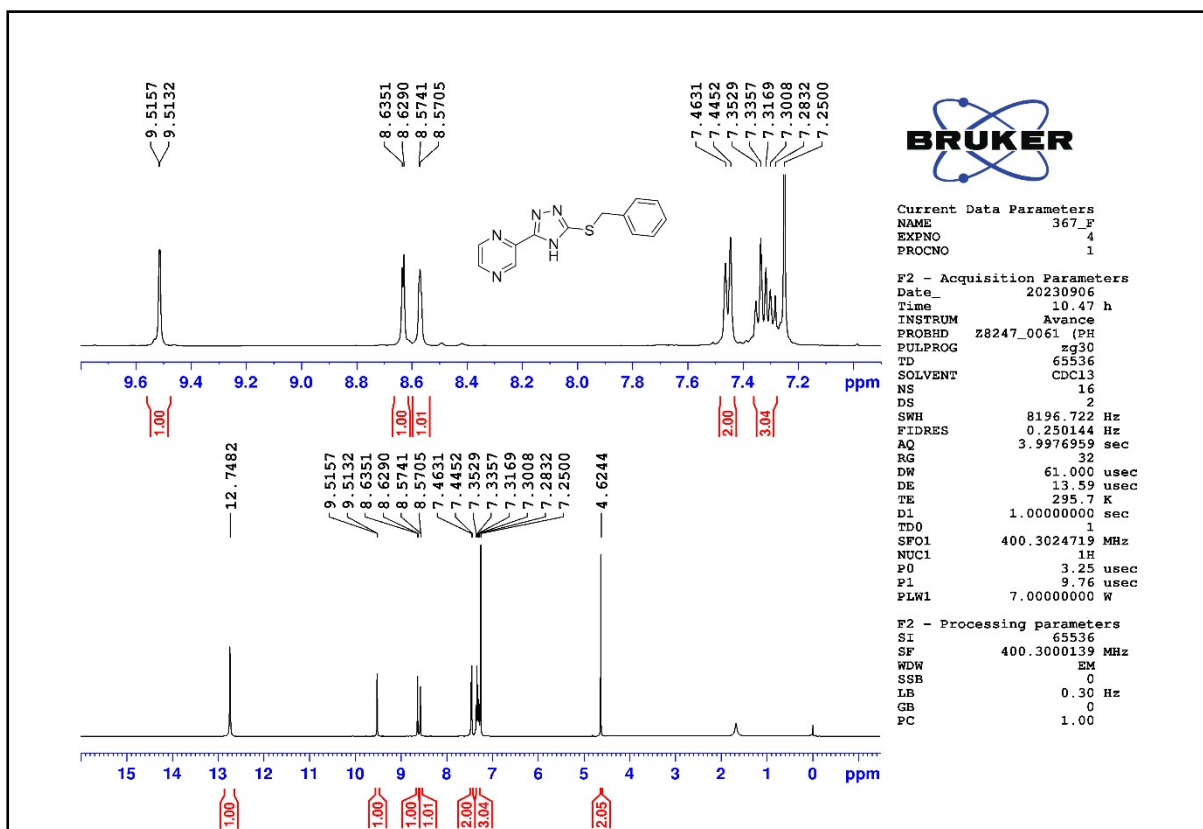

Figure S12: <sup>1</sup>H-NMR spectrum of compound T10

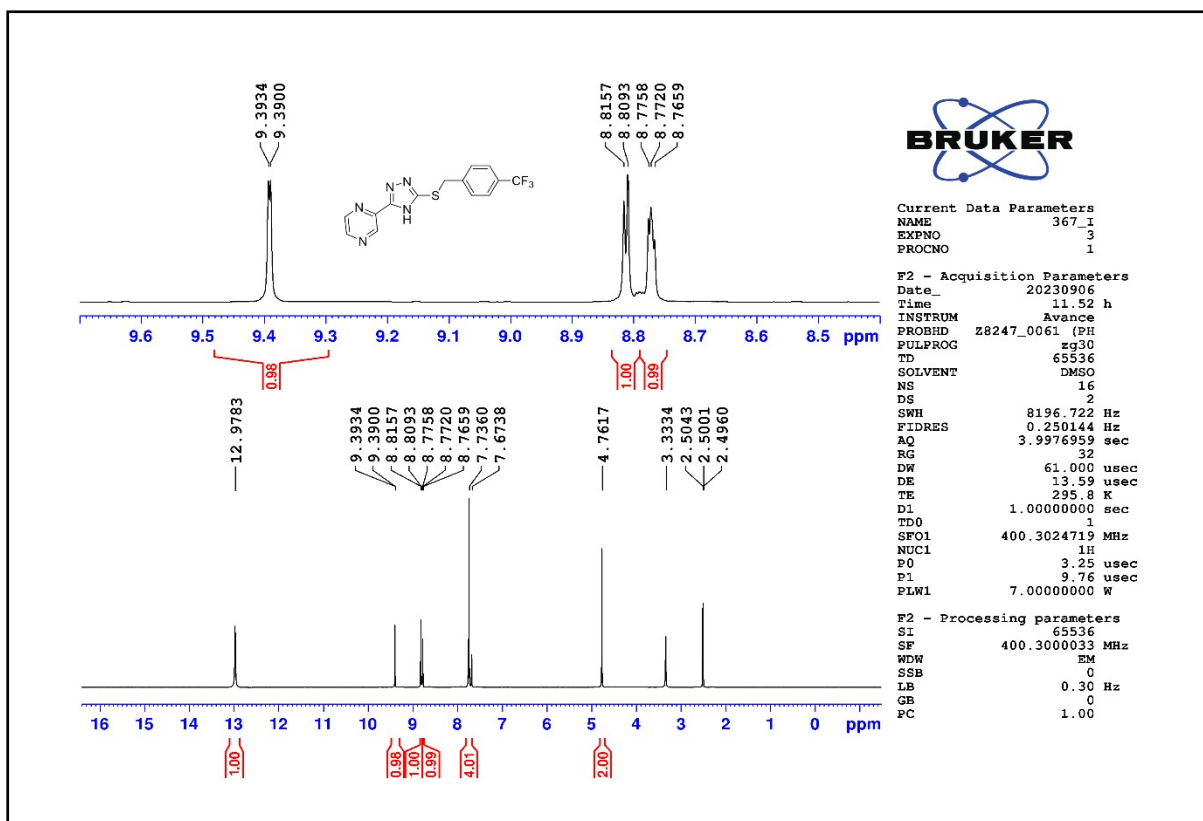

Figure S13: <sup>1</sup>H-NMR spectrum of compound T11

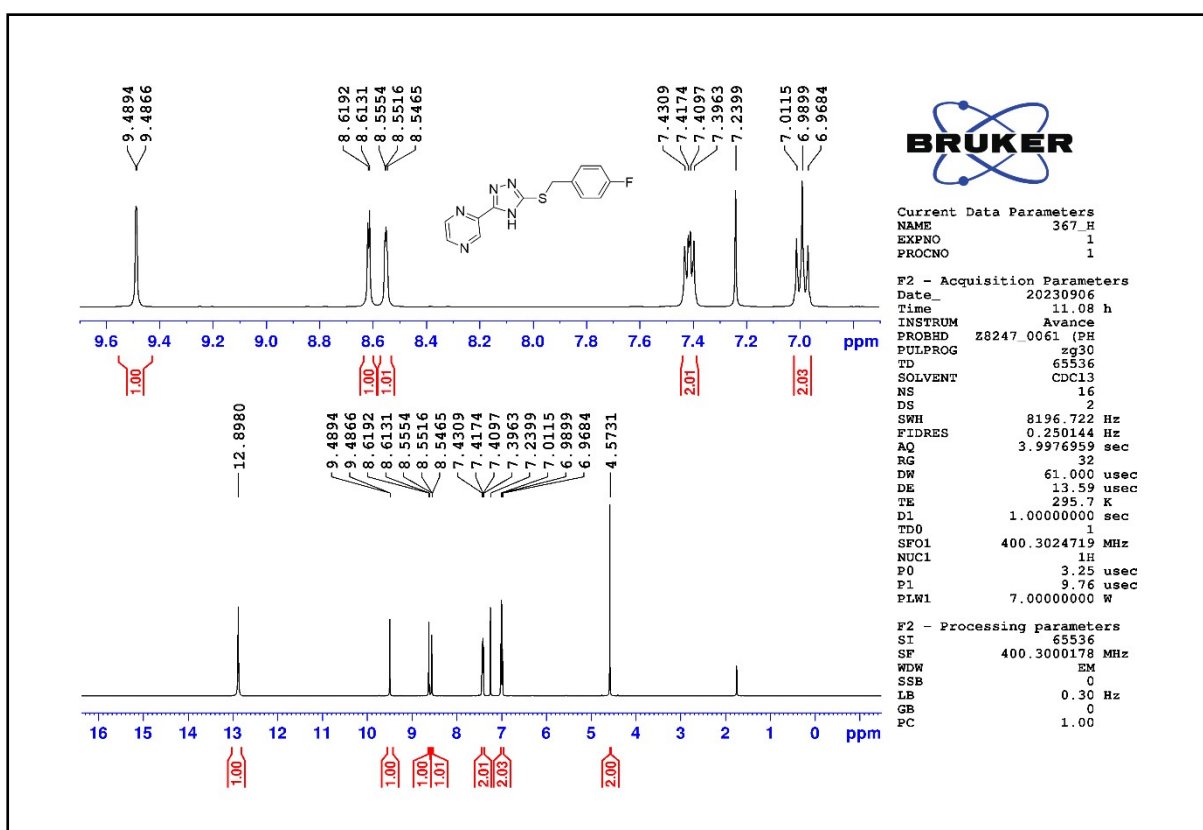

Figure S14: <sup>1</sup>H-NMR spectrum of compound T12

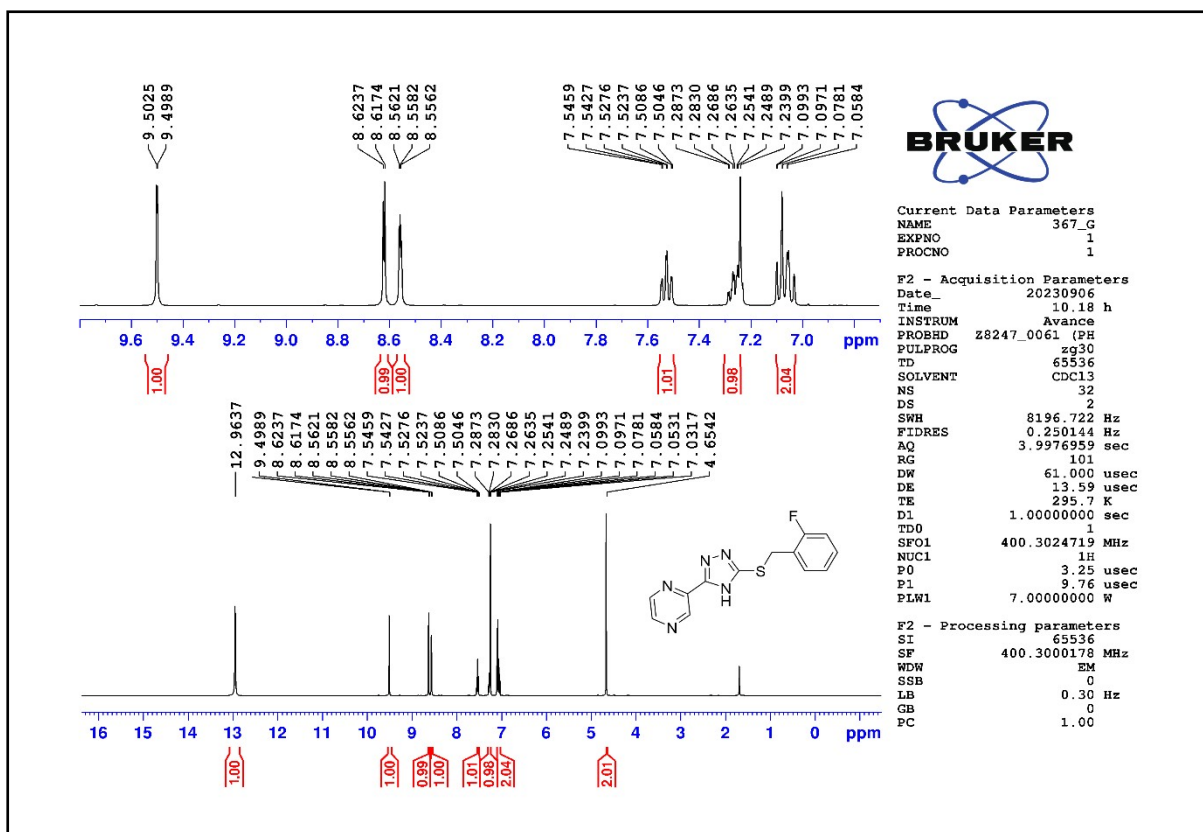

Figure S15: <sup>1</sup>H-NMR spectrum of compound T13

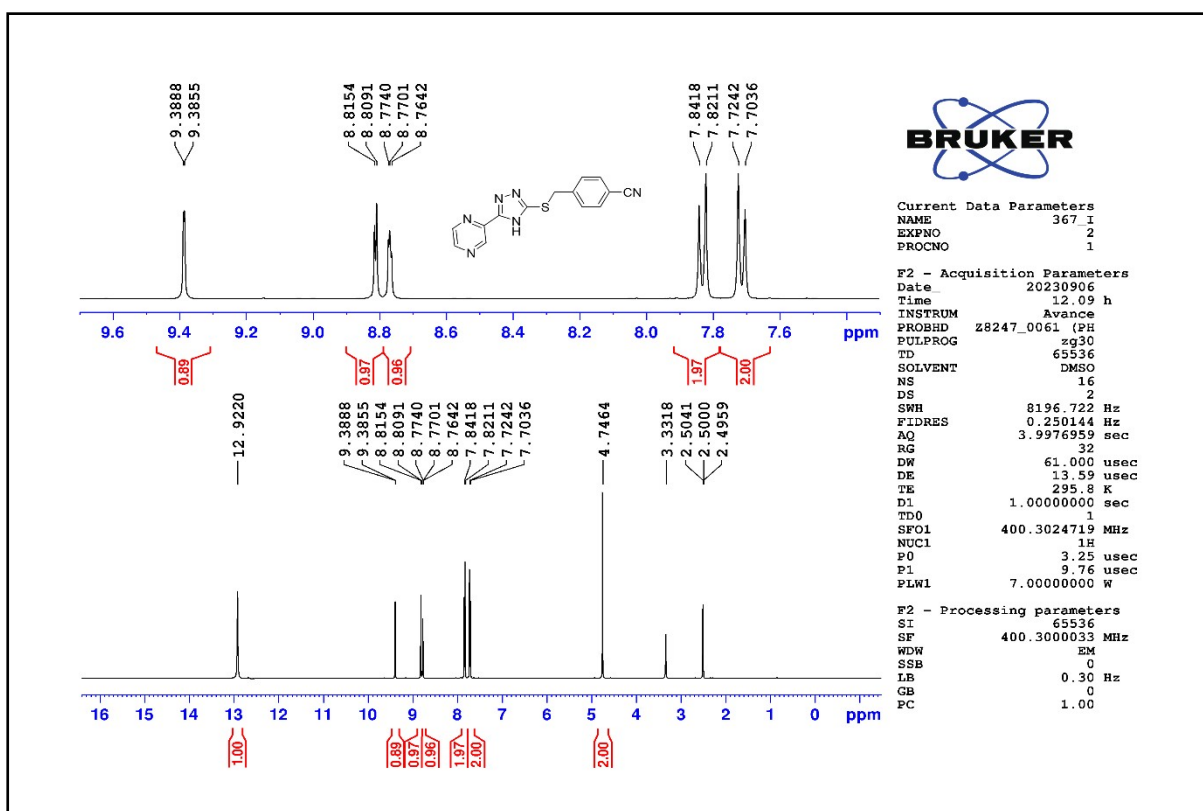

Figure S16: <sup>1</sup>H-NMR spectrum of compound T14



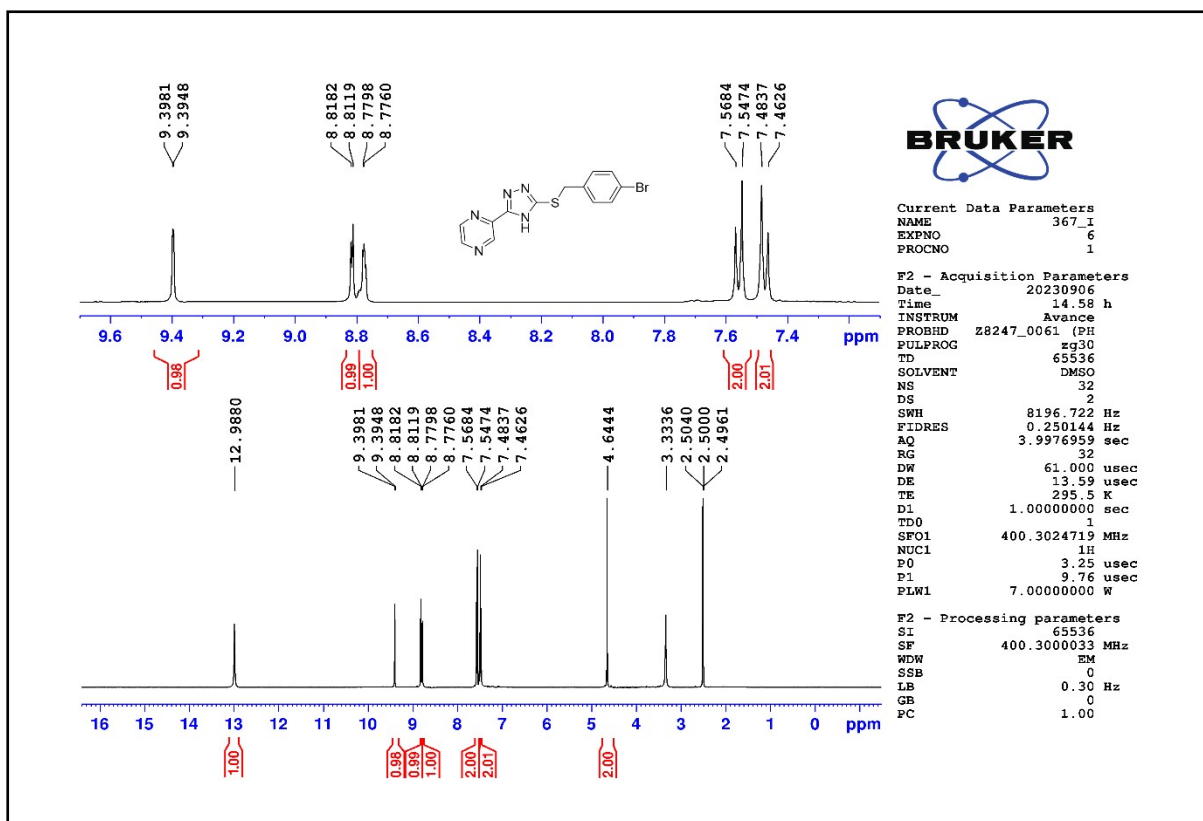

Figure S17: <sup>1</sup>H-NMR spectrum of compound T15

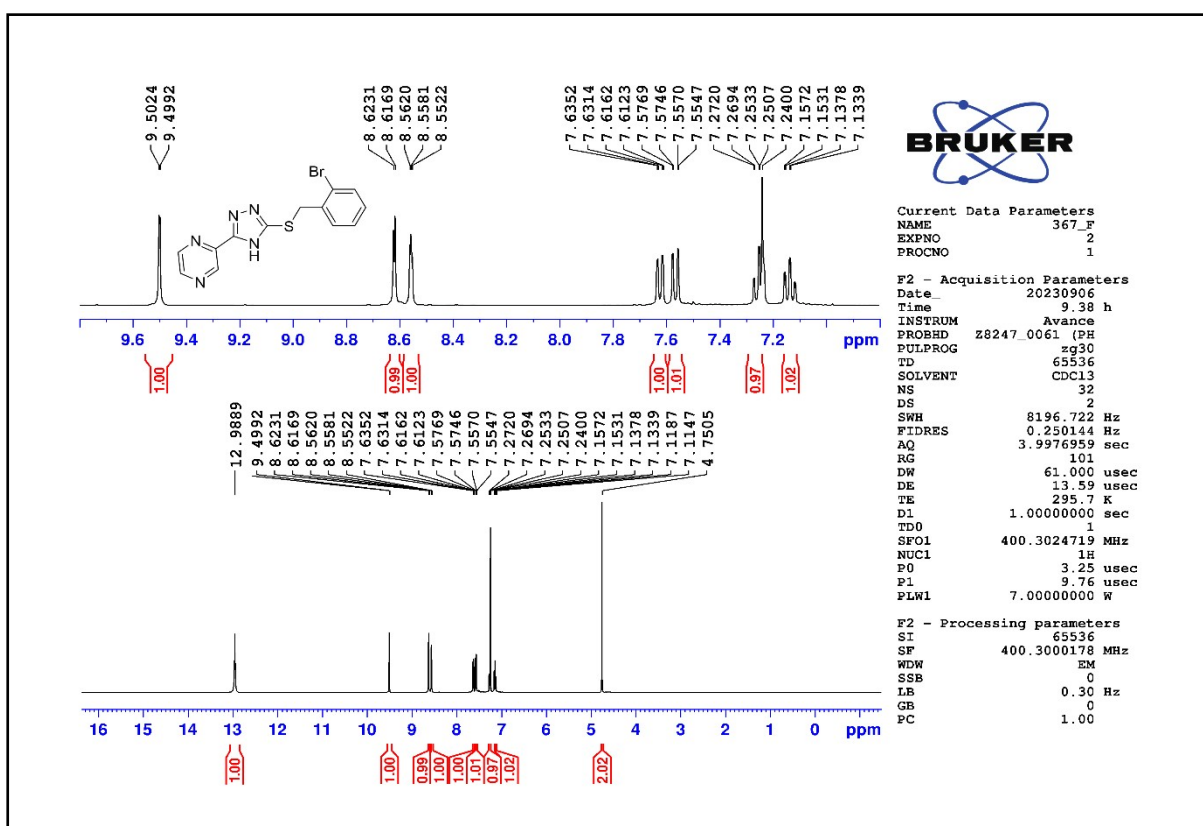

Figure S18: <sup>1</sup>H-NMR spectrum of compound T16

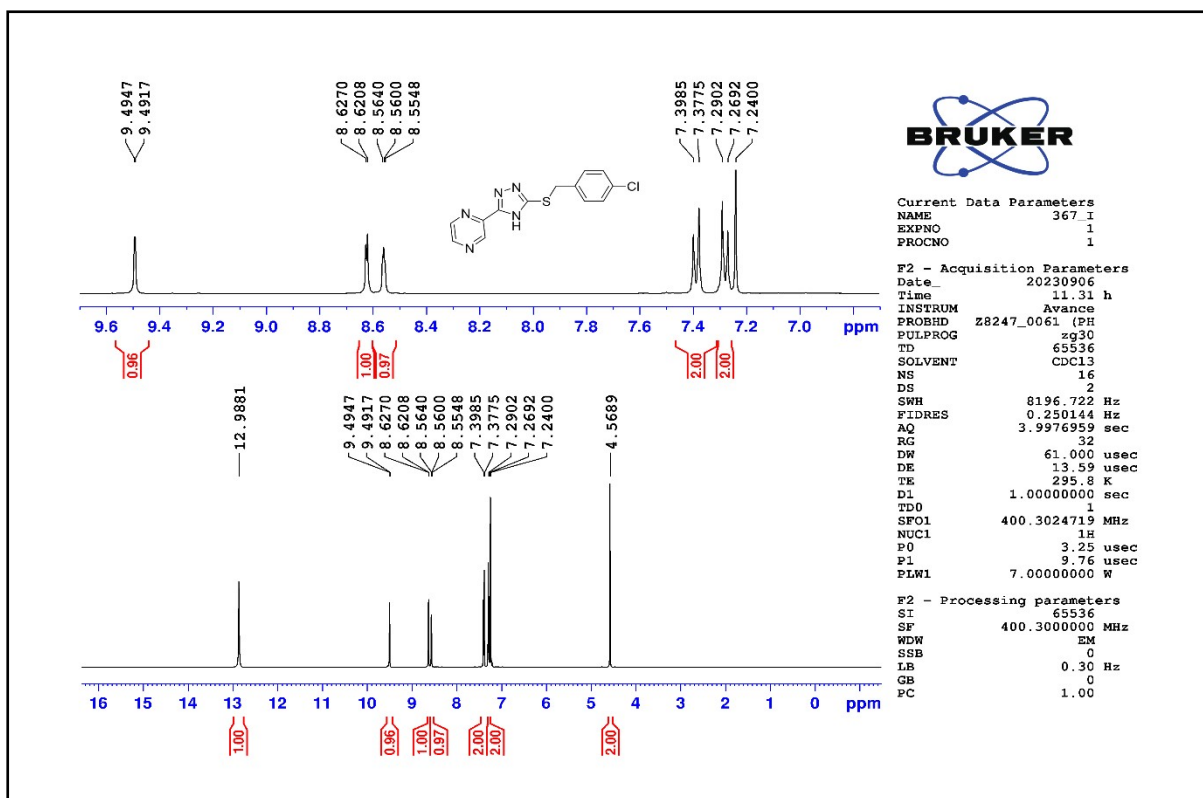

Figure S19: <sup>1</sup>H-NMR spectrum of compound T17

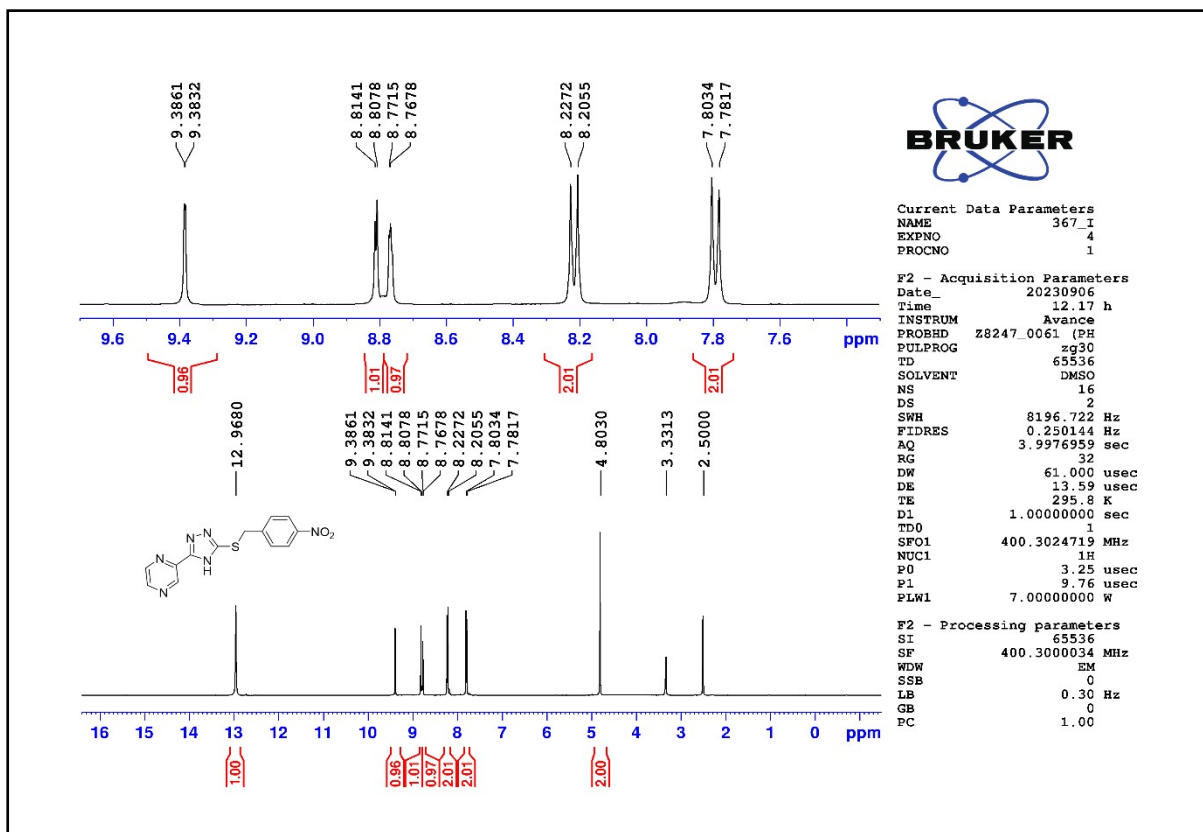

Figure S20: <sup>1</sup>H-NMR spectrum of compound T18



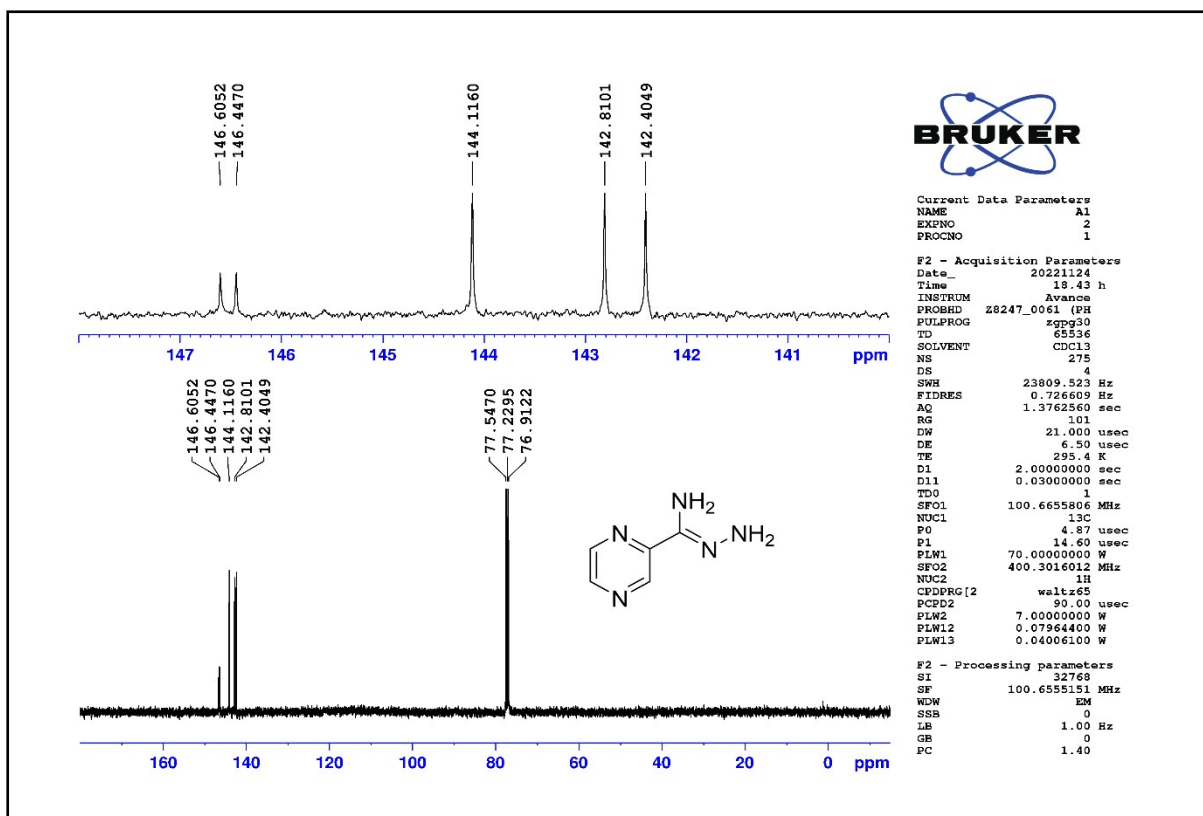

Figure S21: <sup>13</sup>C-NMR spectrum of 2

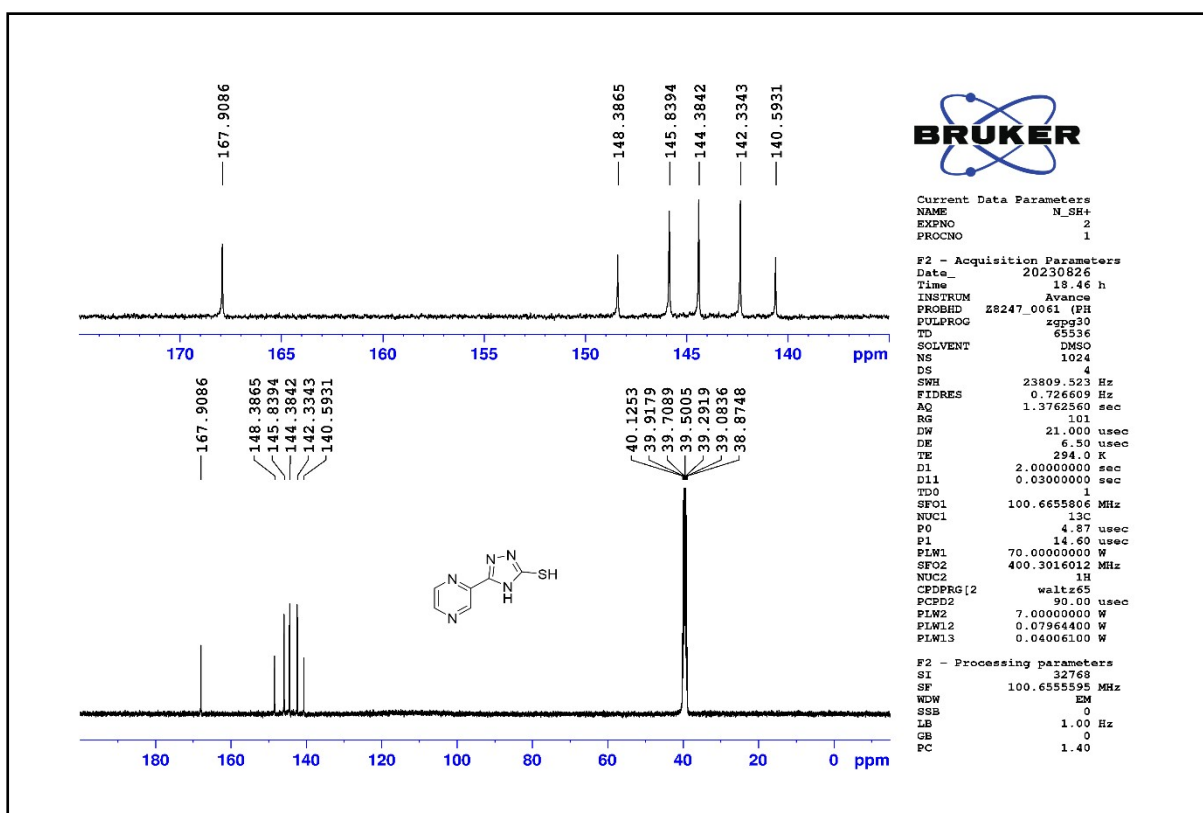

Figure S22: <sup>13</sup>C-NMR spectrum of 3

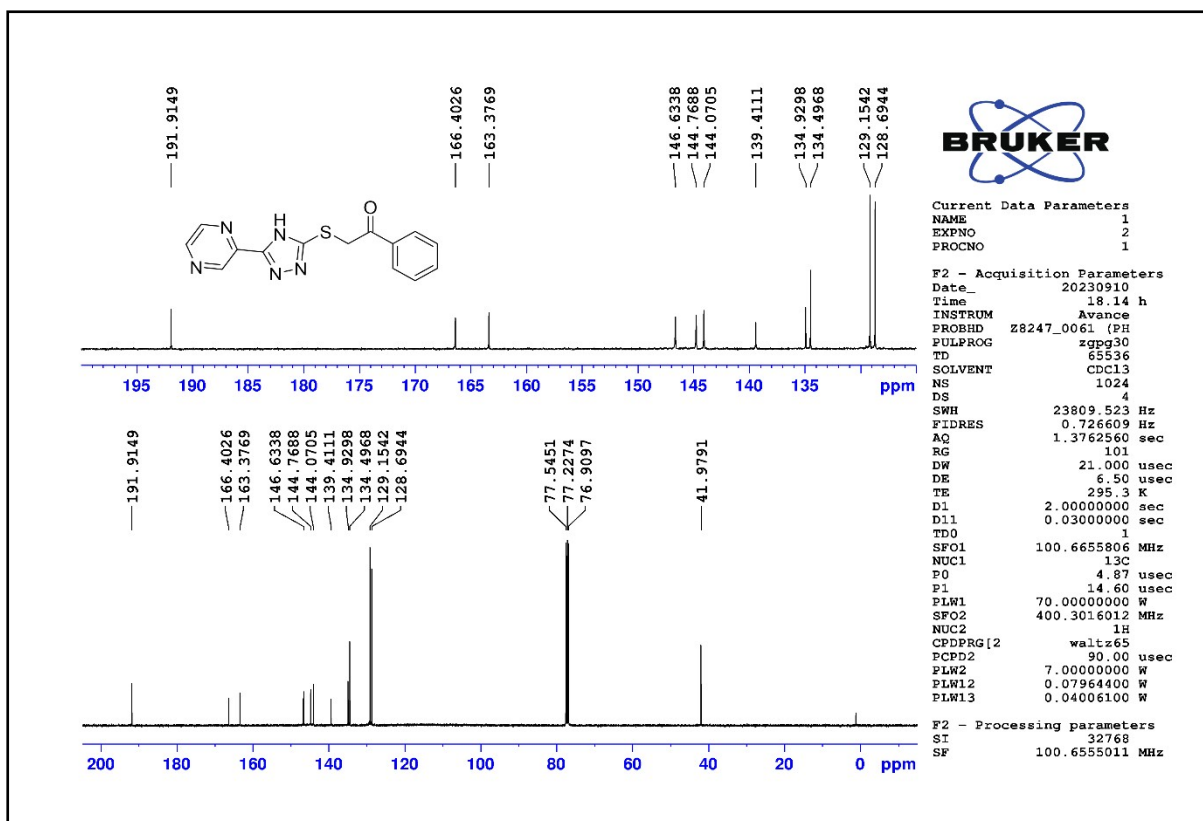

Figure S23: <sup>13</sup>C-NMR spectrum of T1

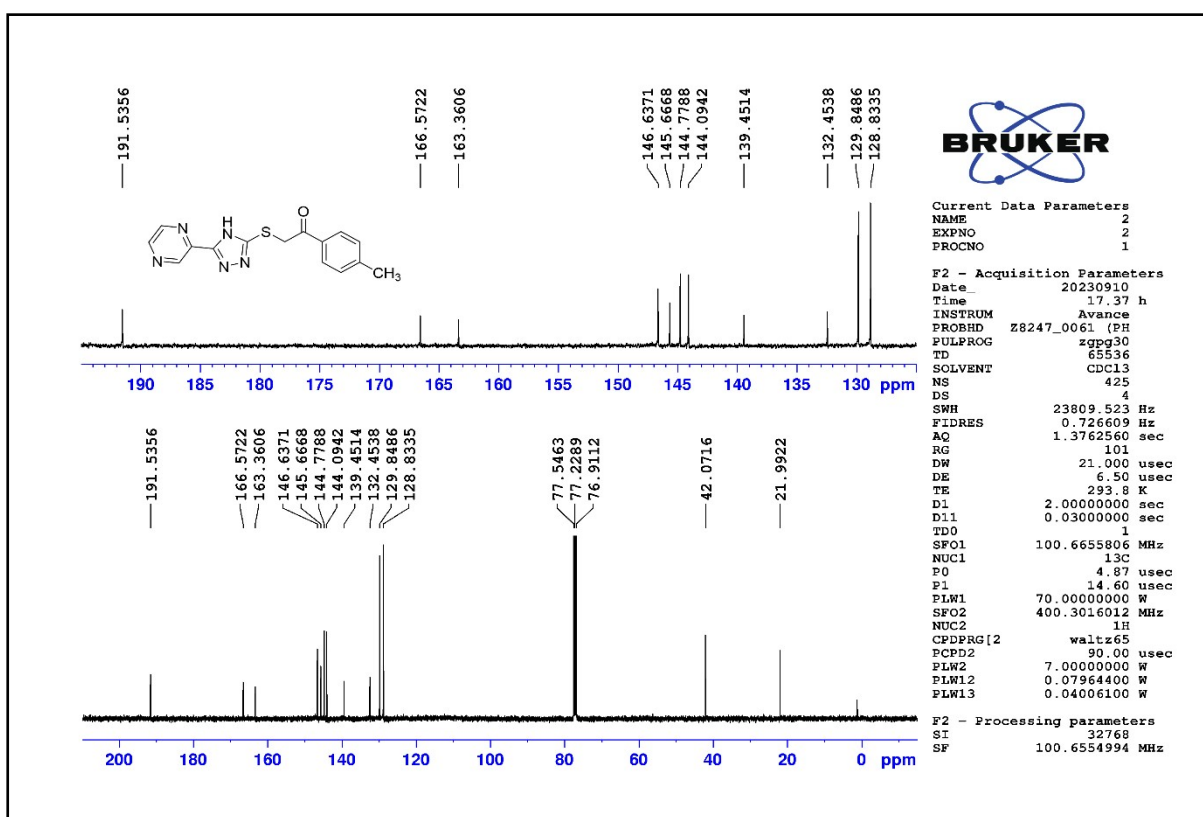

Figure S24: <sup>13</sup>C-NMR spectrum of T2

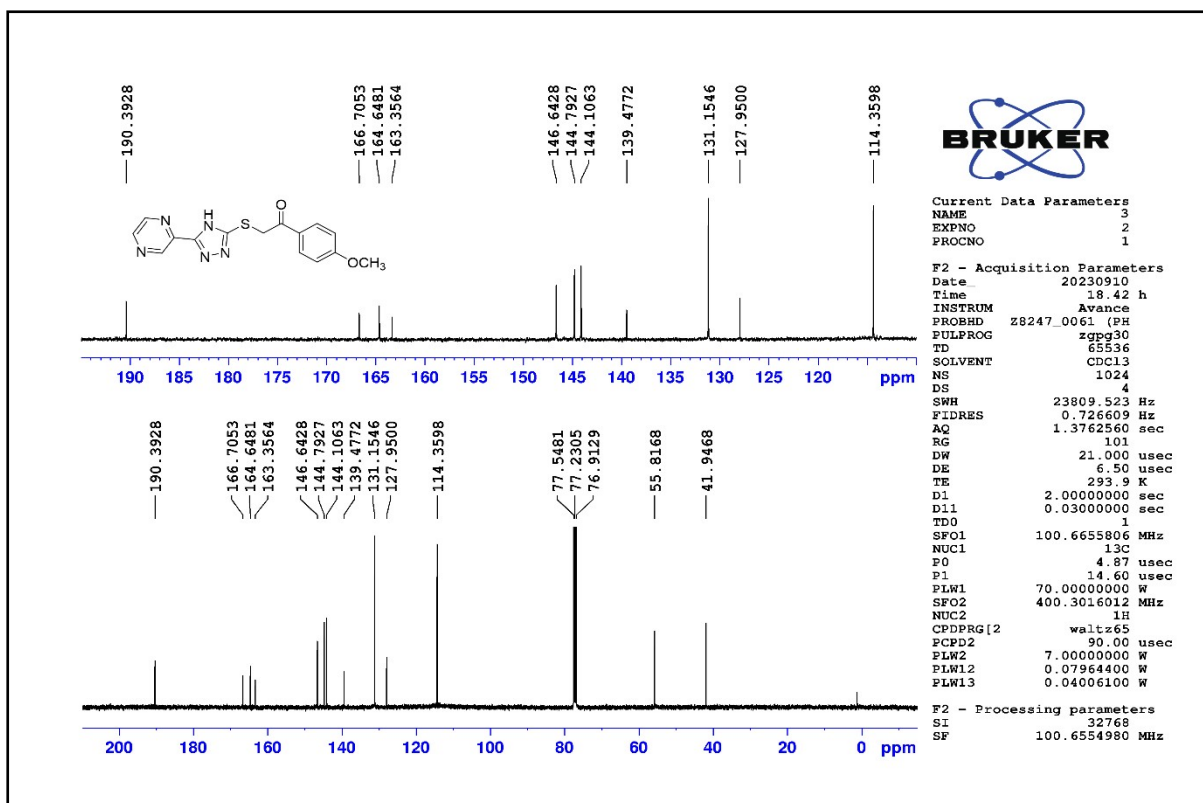

Figure S25:  $^{13}\text{C}$ -NMR spectrum of T3

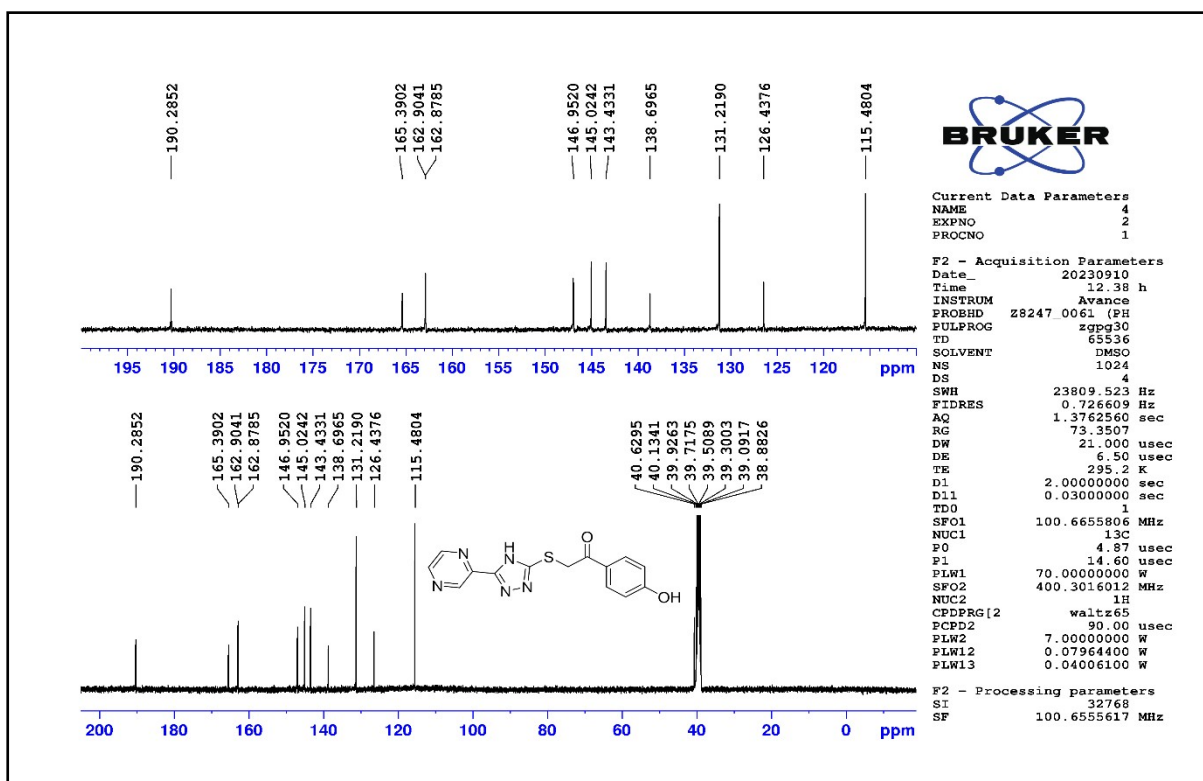

Figure S26:  $^{13}\text{C}$ -NMR spectrum of T4

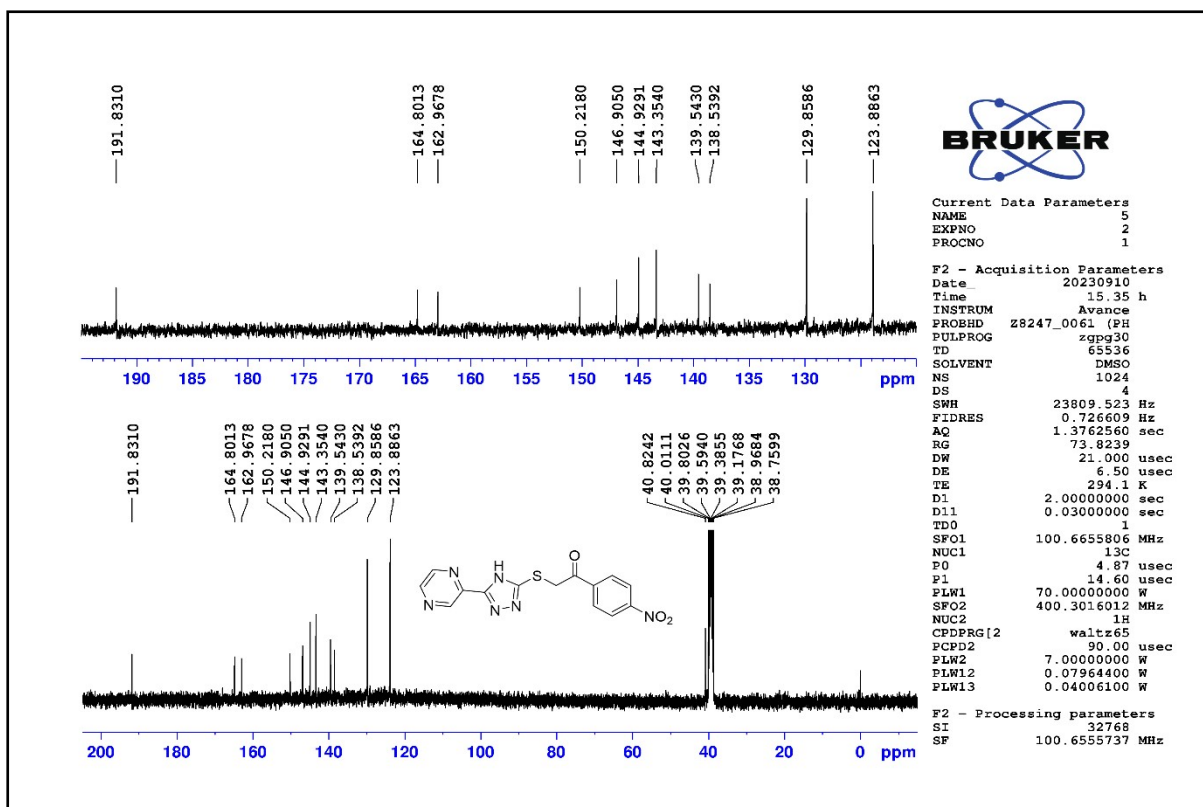

Figure S27: <sup>13</sup>C-NMR spectrum of T5

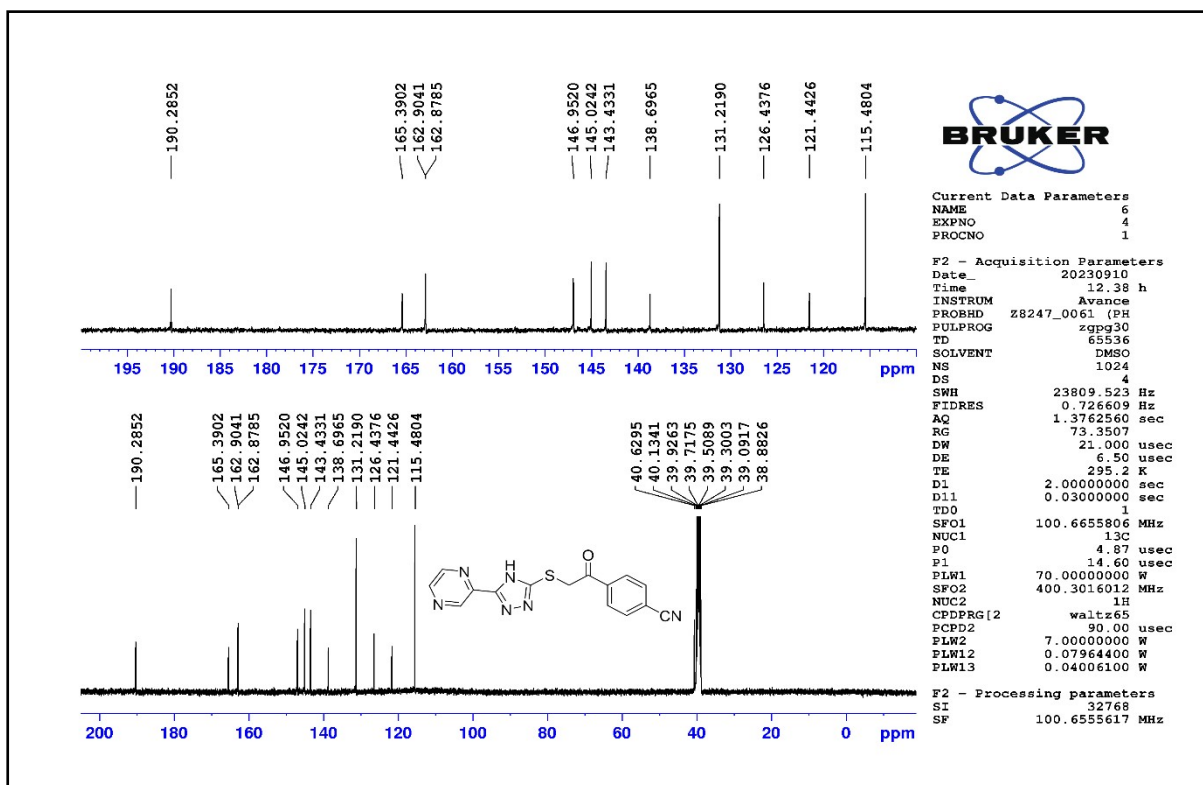

Figure S28: <sup>13</sup>C-NMR spectrum of T6

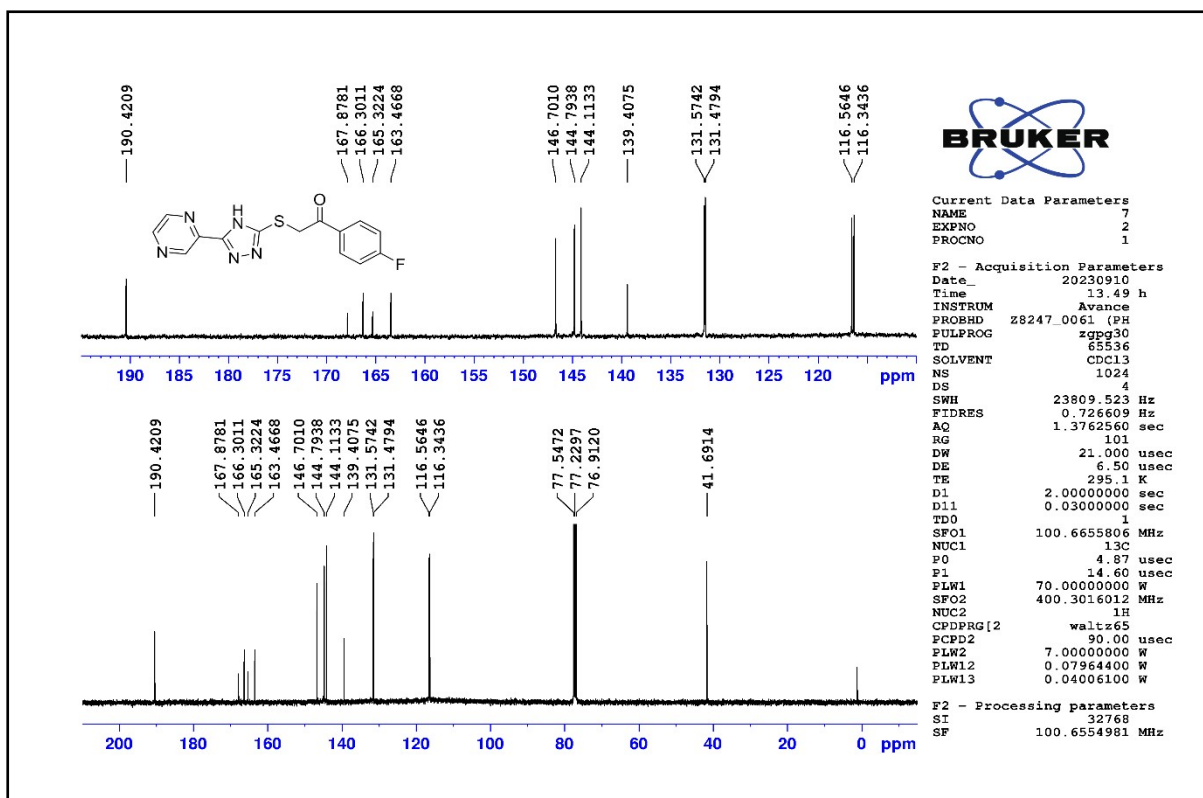

Figure S29: <sup>13</sup>C-NMR spectrum of T7

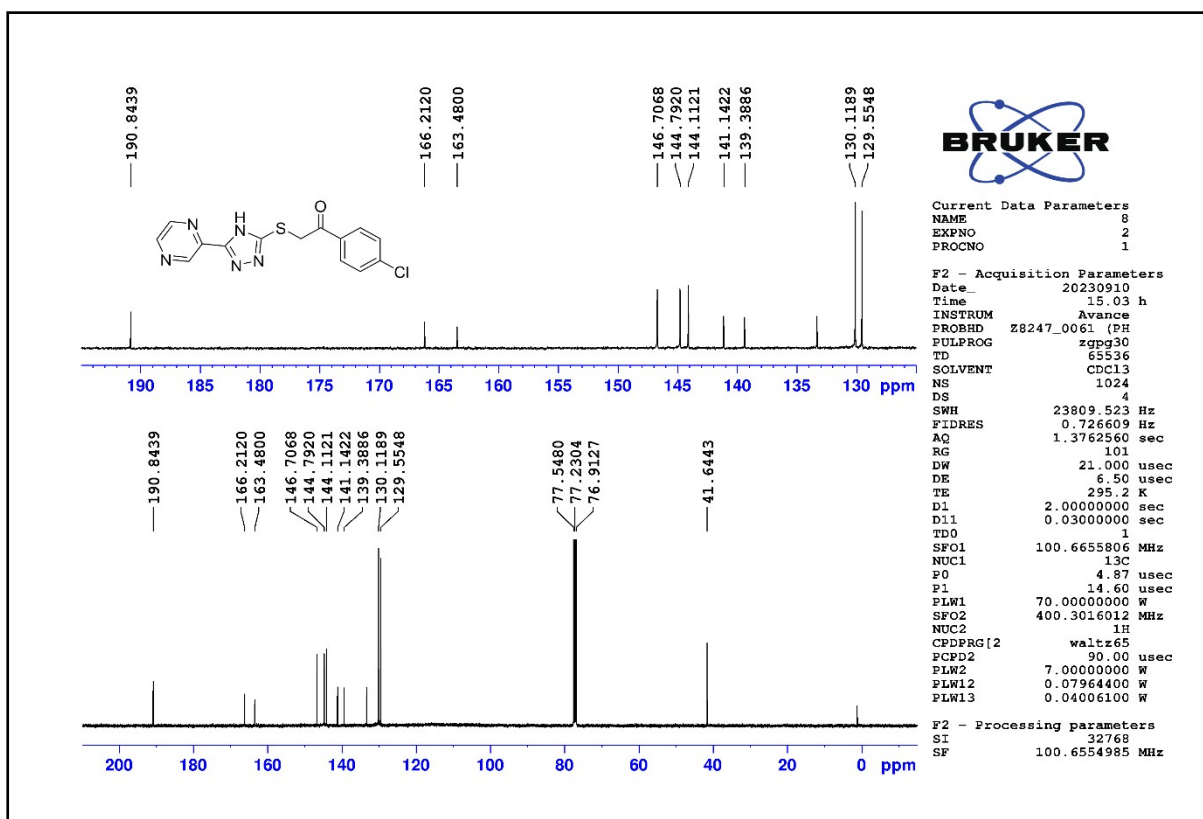

Figure S30: <sup>13</sup>C-NMR spectrum of T8



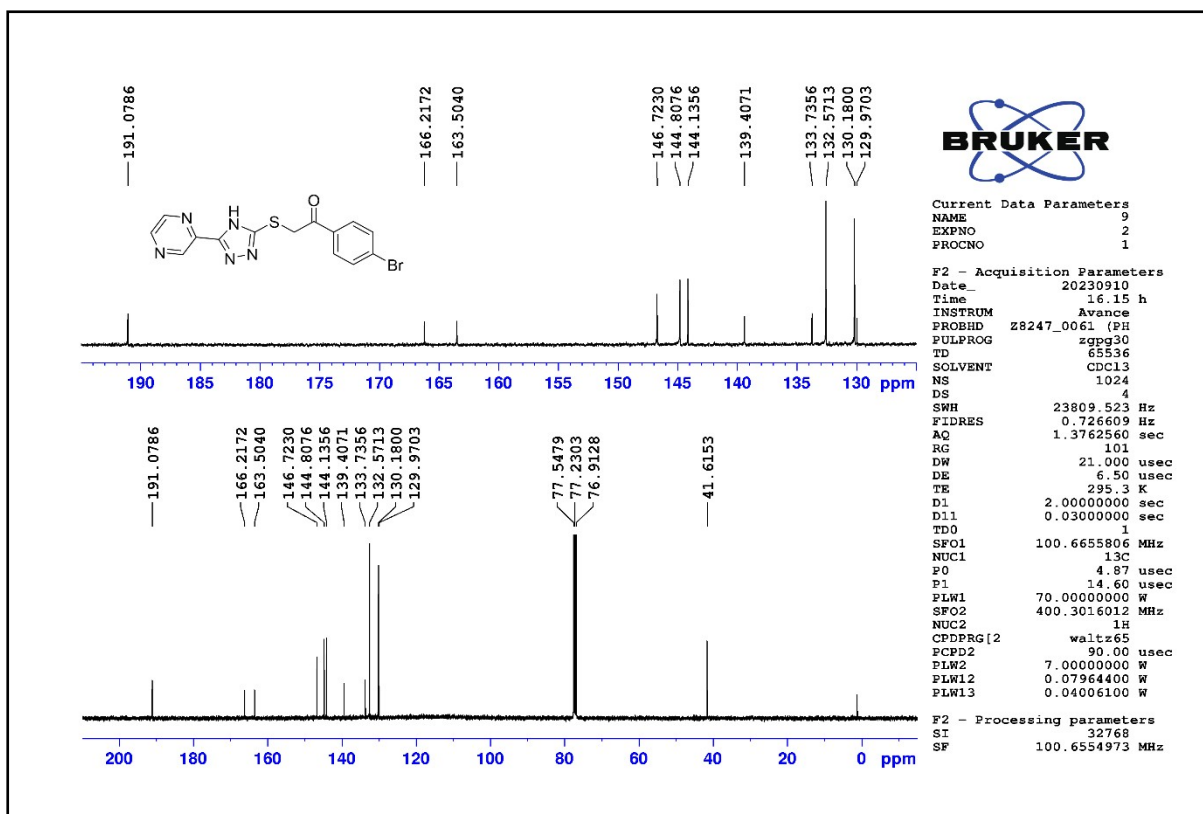

Figure S31: <sup>13</sup>C-NMR spectrum of T9

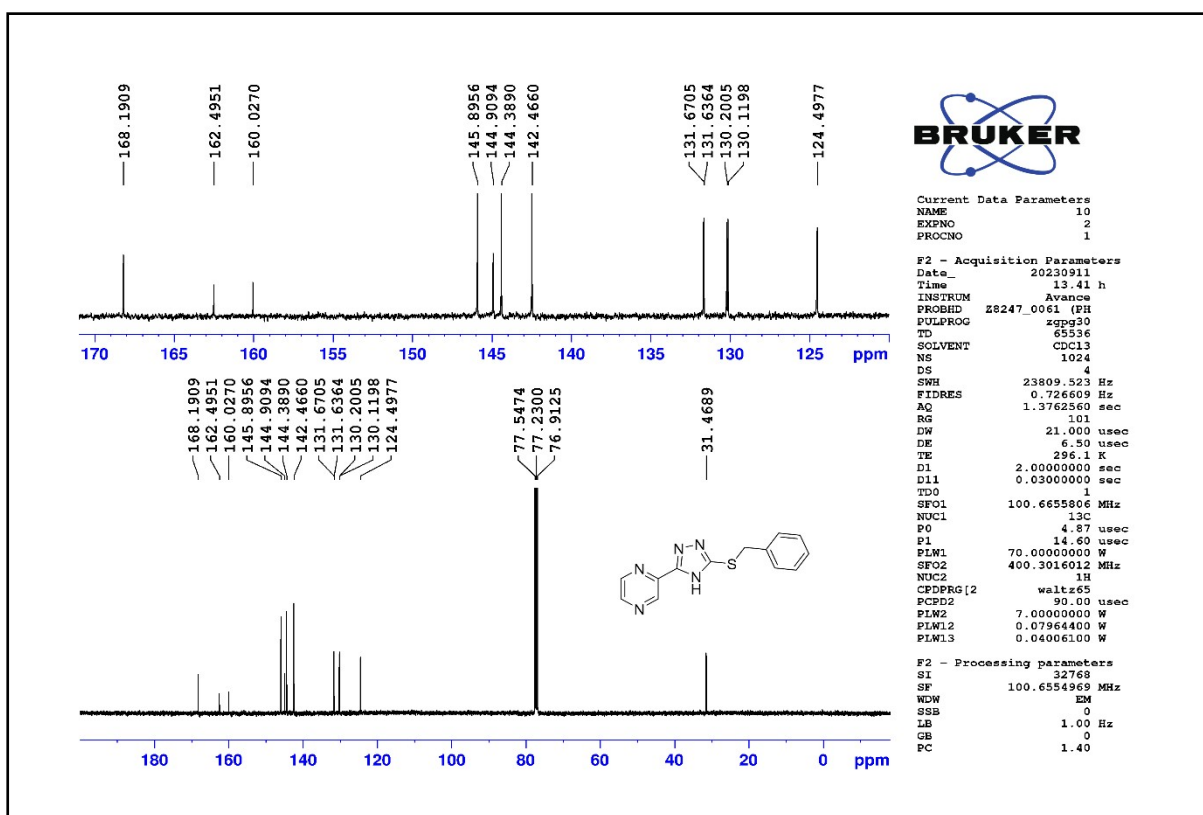

Figure S32: <sup>13</sup>C-NMR spectrum of T10

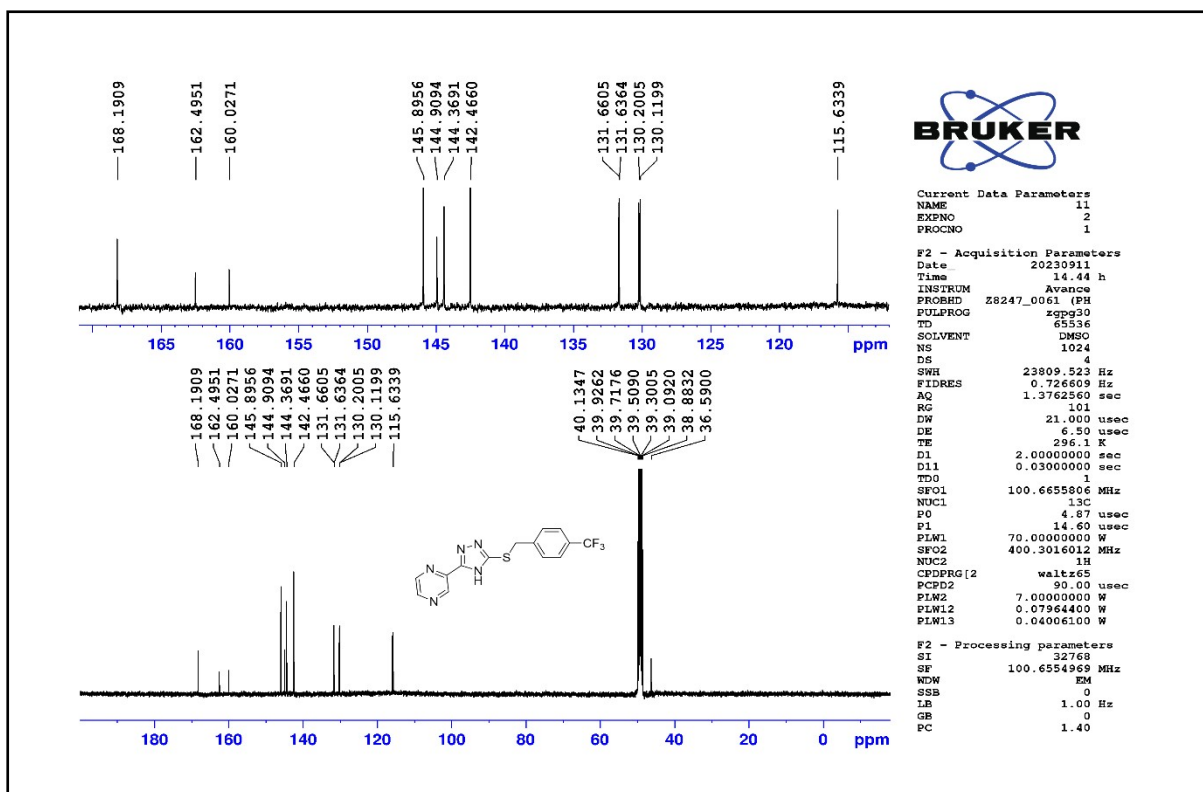

Figure S33:  $^{13}\text{C}$ -NMR spectrum of T11

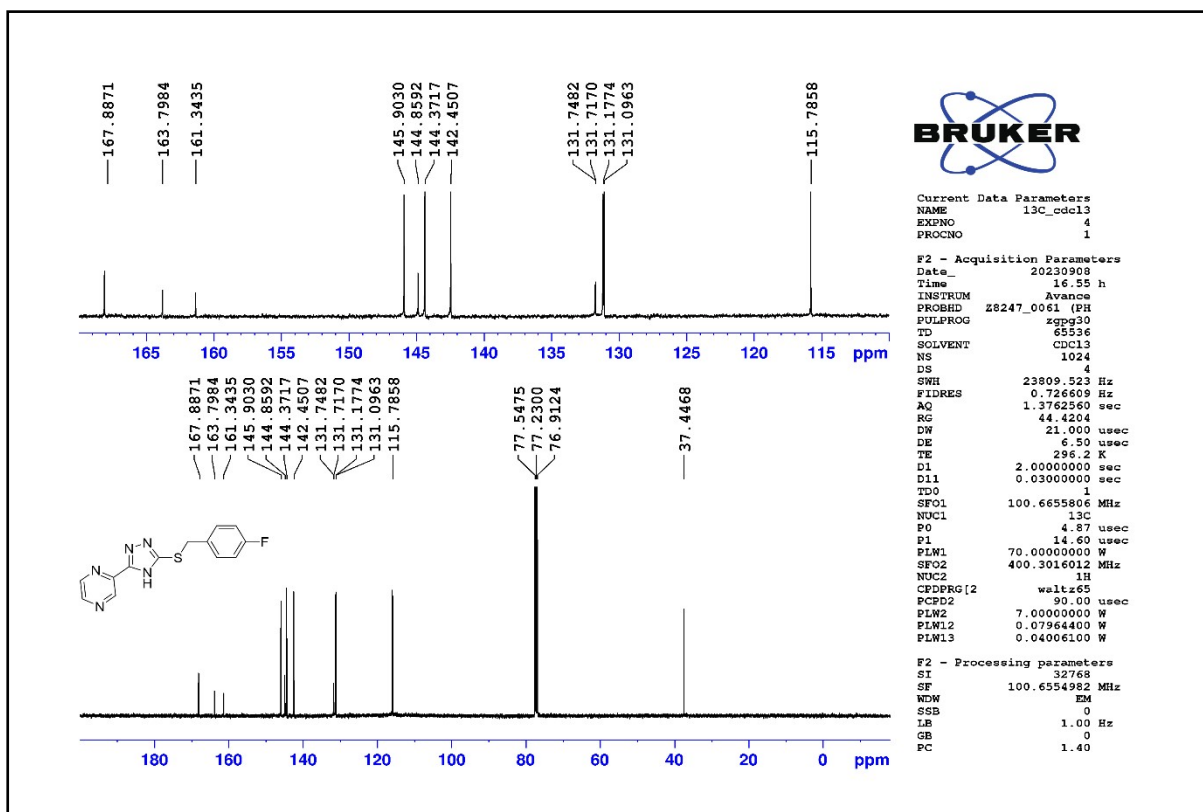

Figure S34:  $^{13}\text{C}$ -NMR spectrum of T12



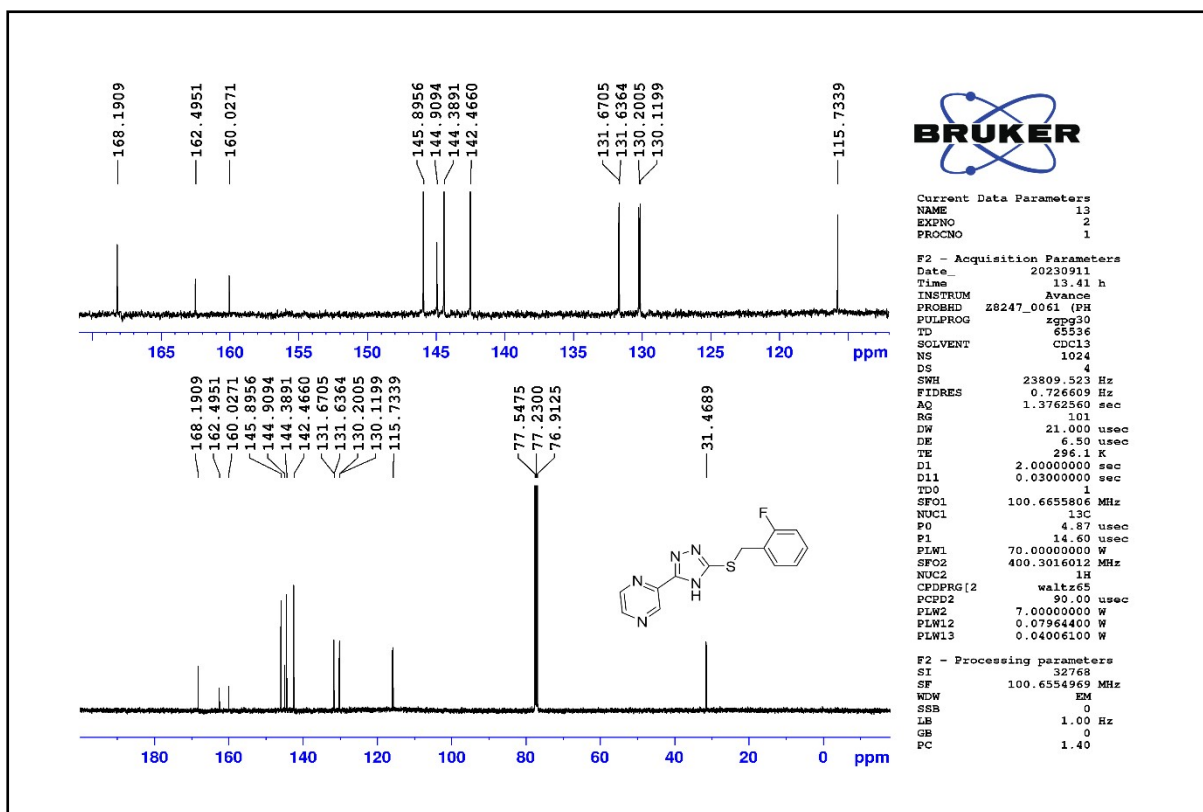

Figure S35:  $^{13}\text{C}$ -NMR spectrum of T13

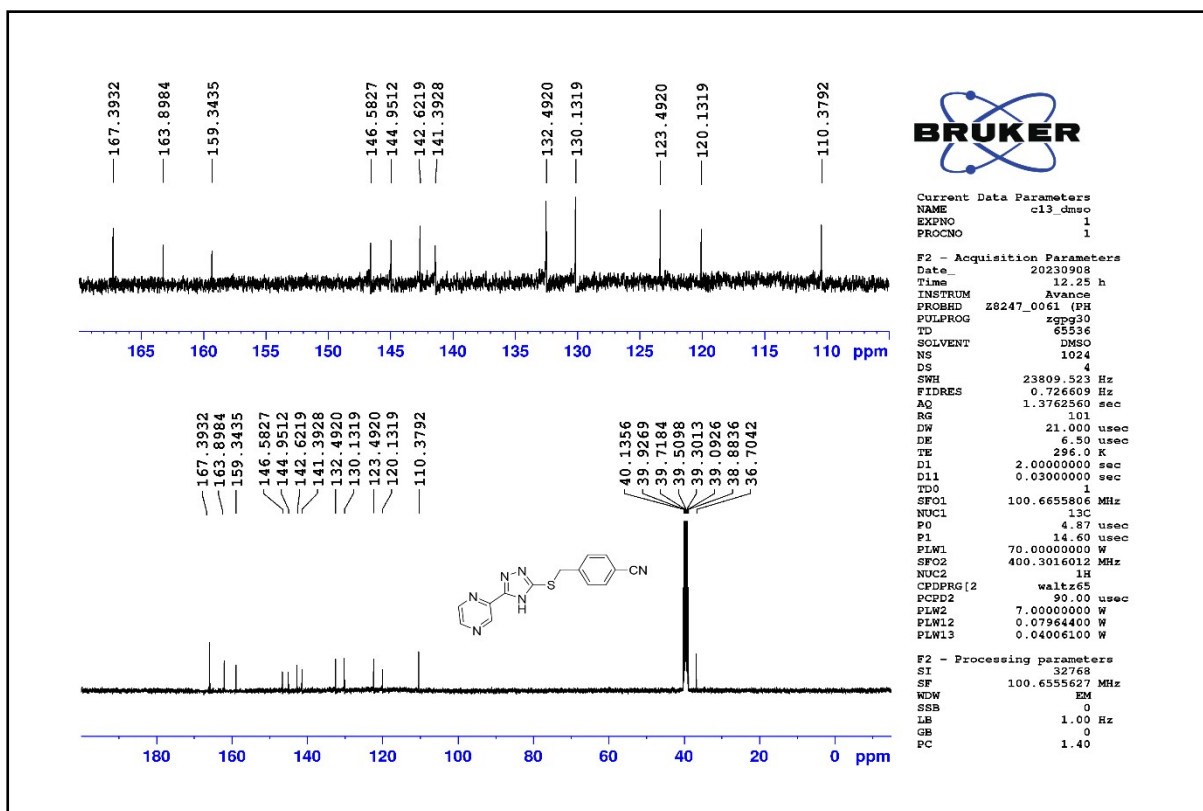

Figure S36:  $^{13}\text{C}$ -NMR spectrum of T14

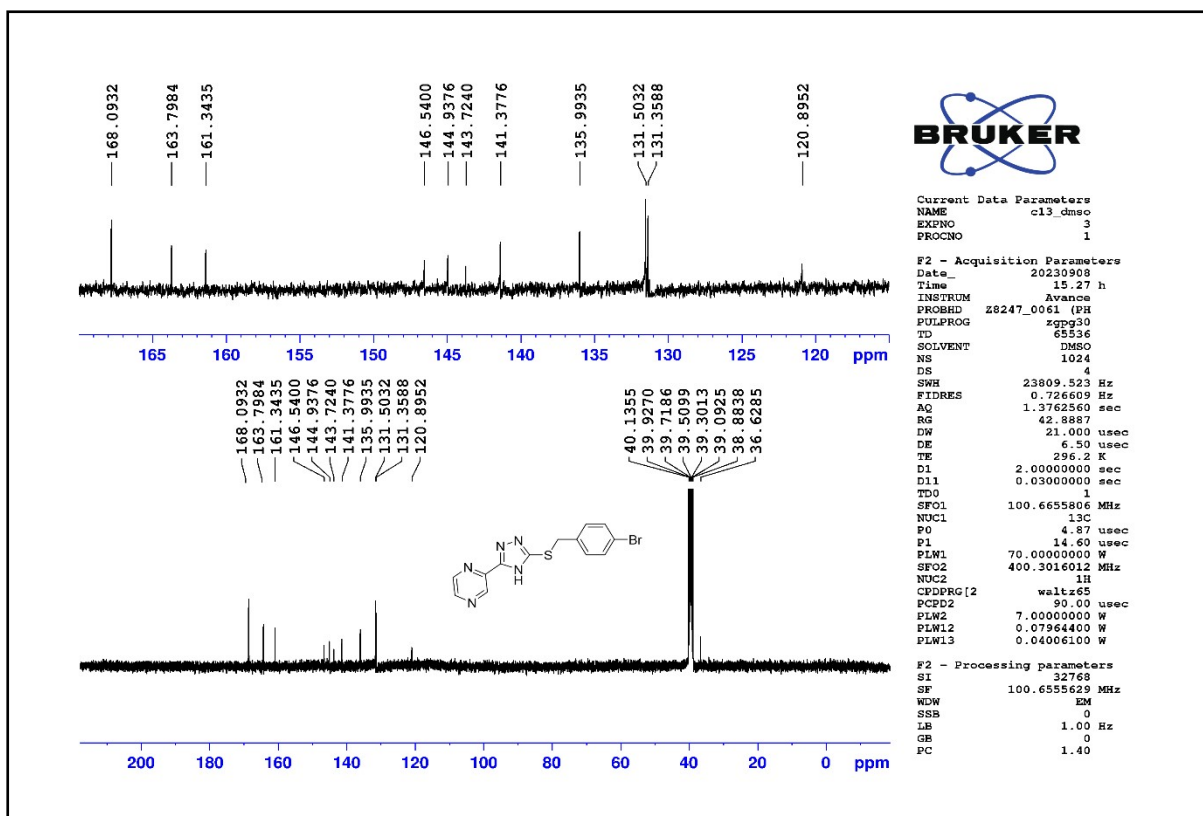

Figure S37: <sup>13</sup>C-NMR spectrum of T15

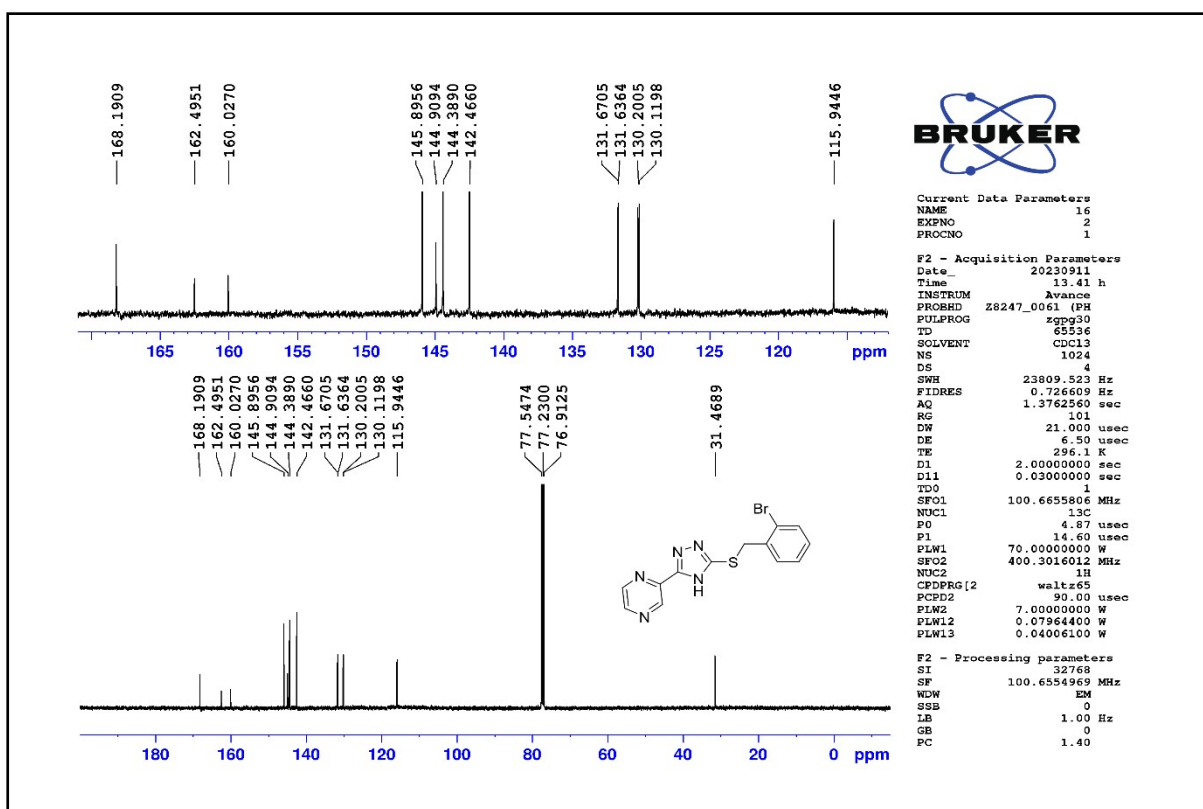

Figure S38: <sup>13</sup>C-NMR spectrum of T16

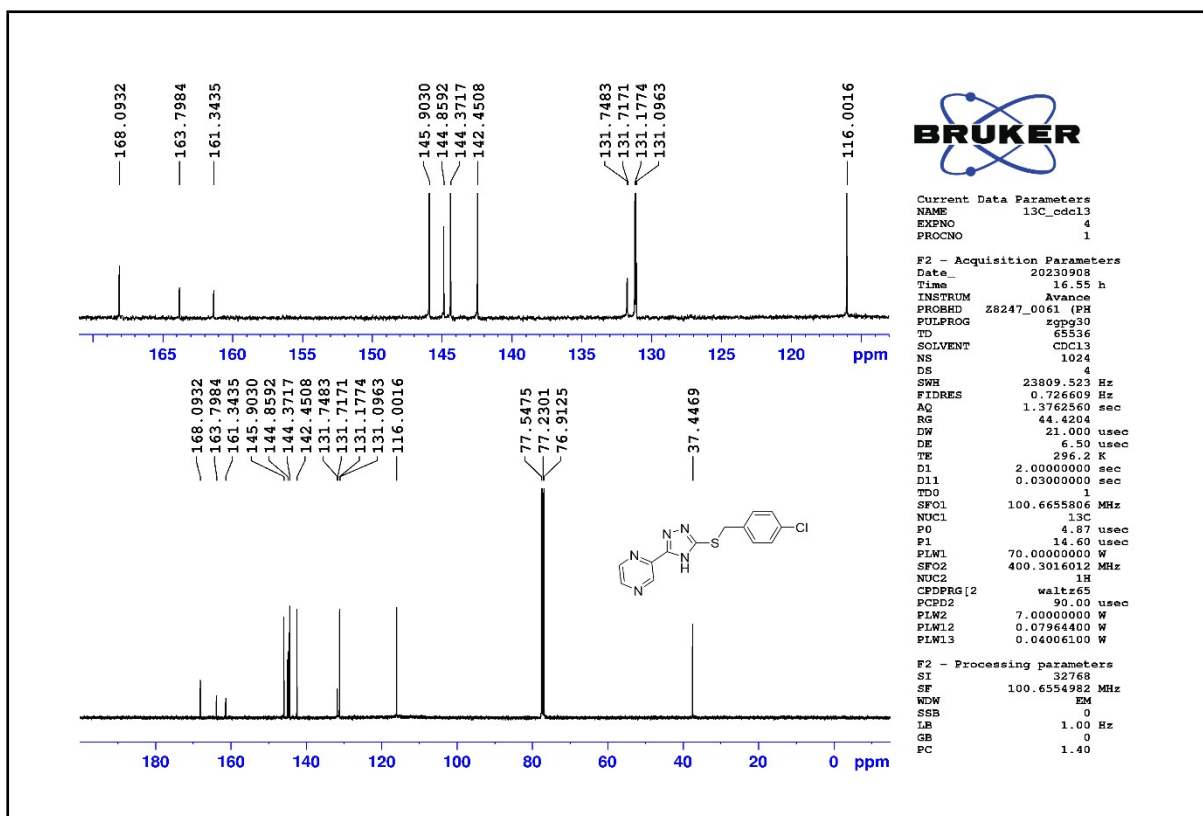

Figure S39: <sup>13</sup>C-NMR spectrum of T17

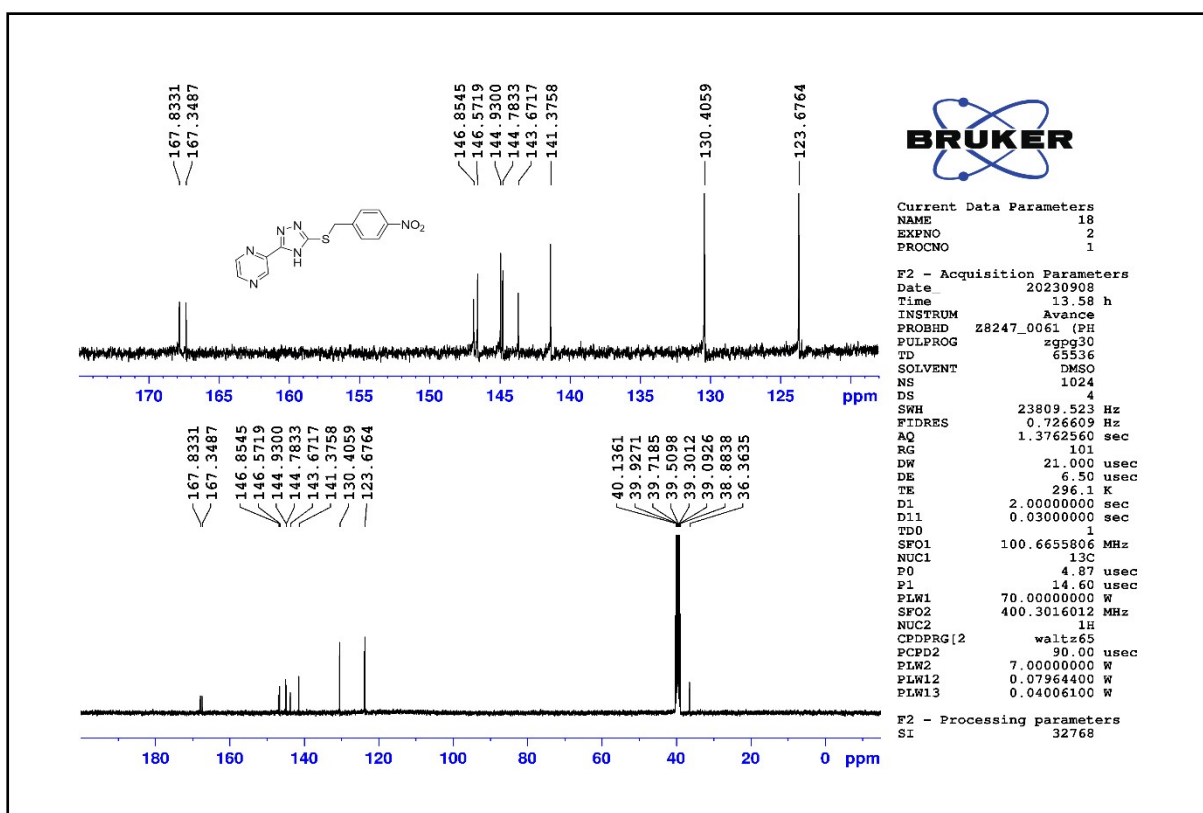

Figure S40: <sup>13</sup>C-NMR spectrum of T18

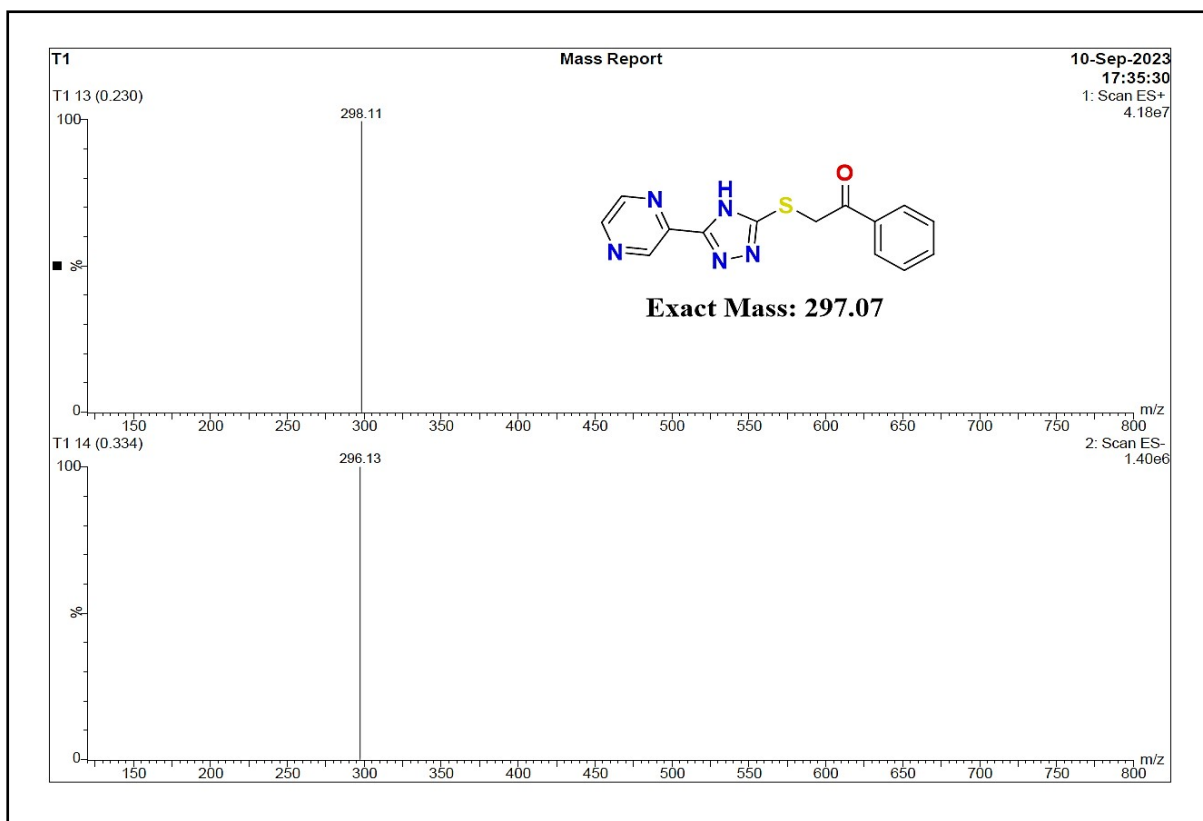

**Figure S41:** ESI-MS spectrum of compound T1

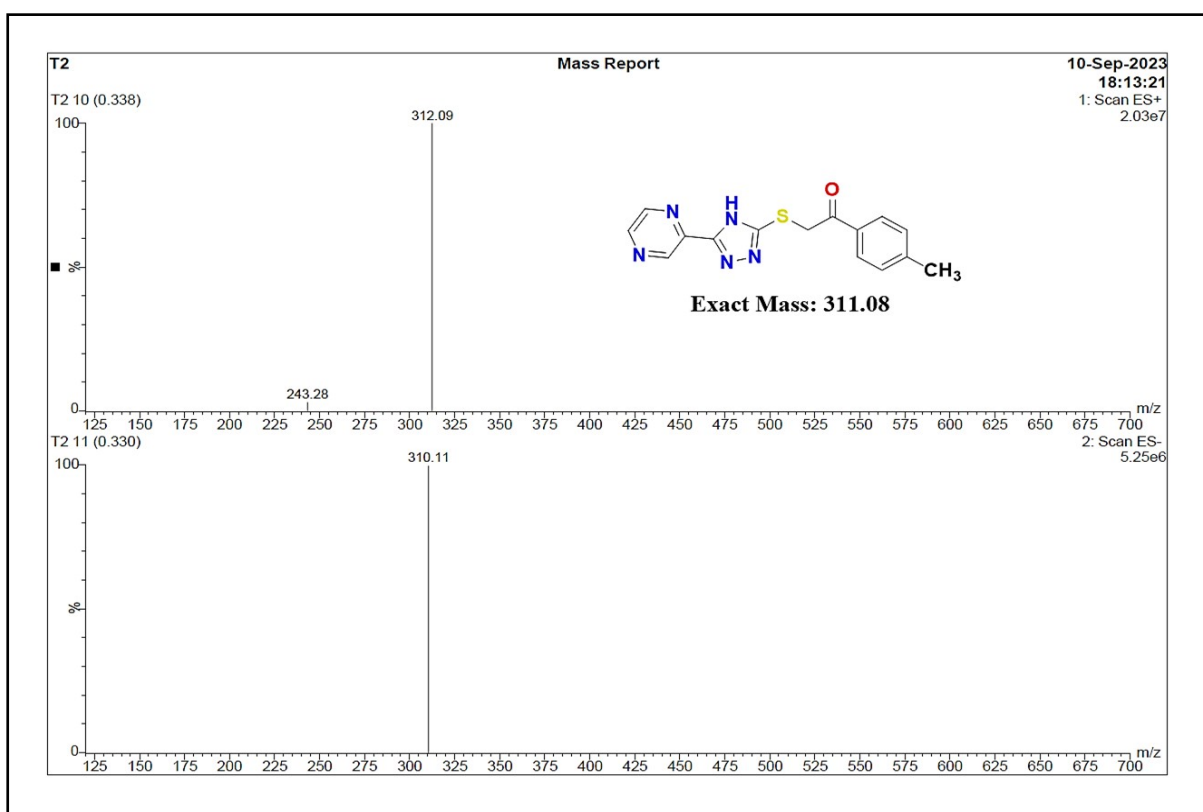

**Figure S42:** ESI-MS spectrum of compound T2

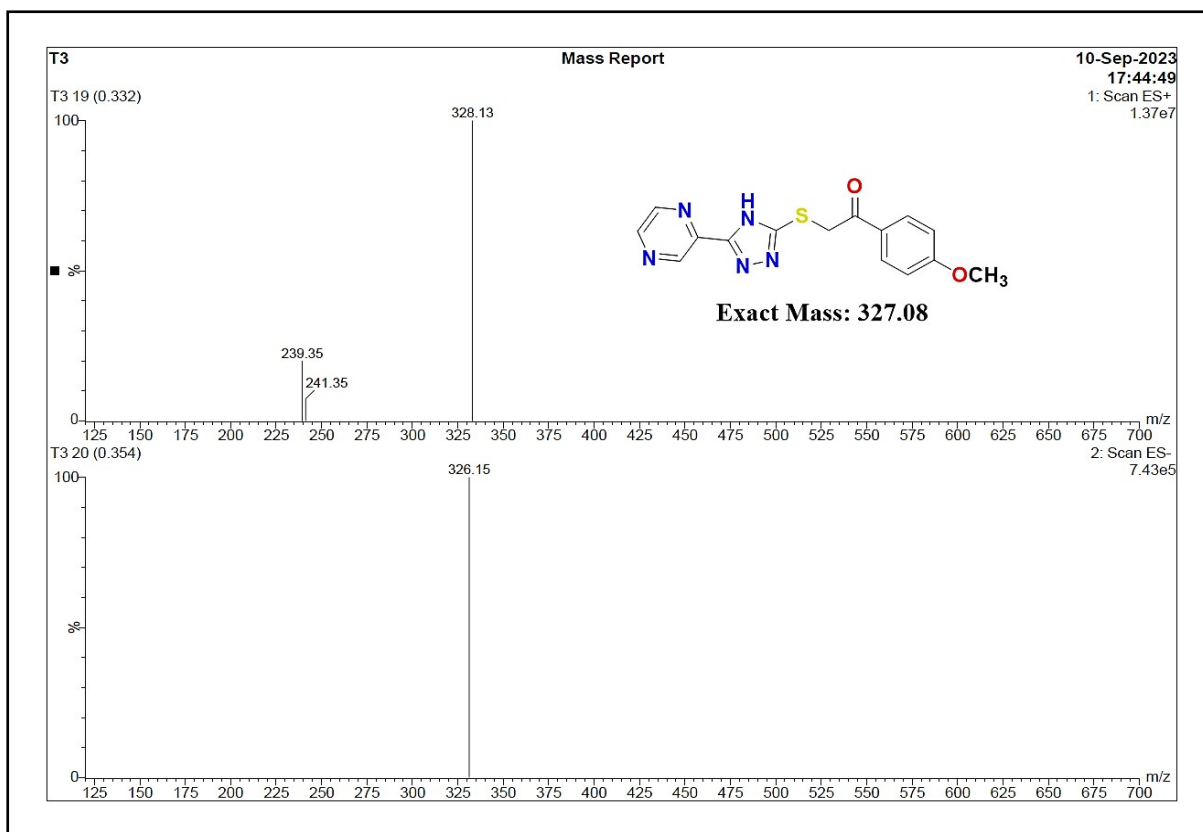

**Figure S43: ESI-MS spectrum of compound T3**

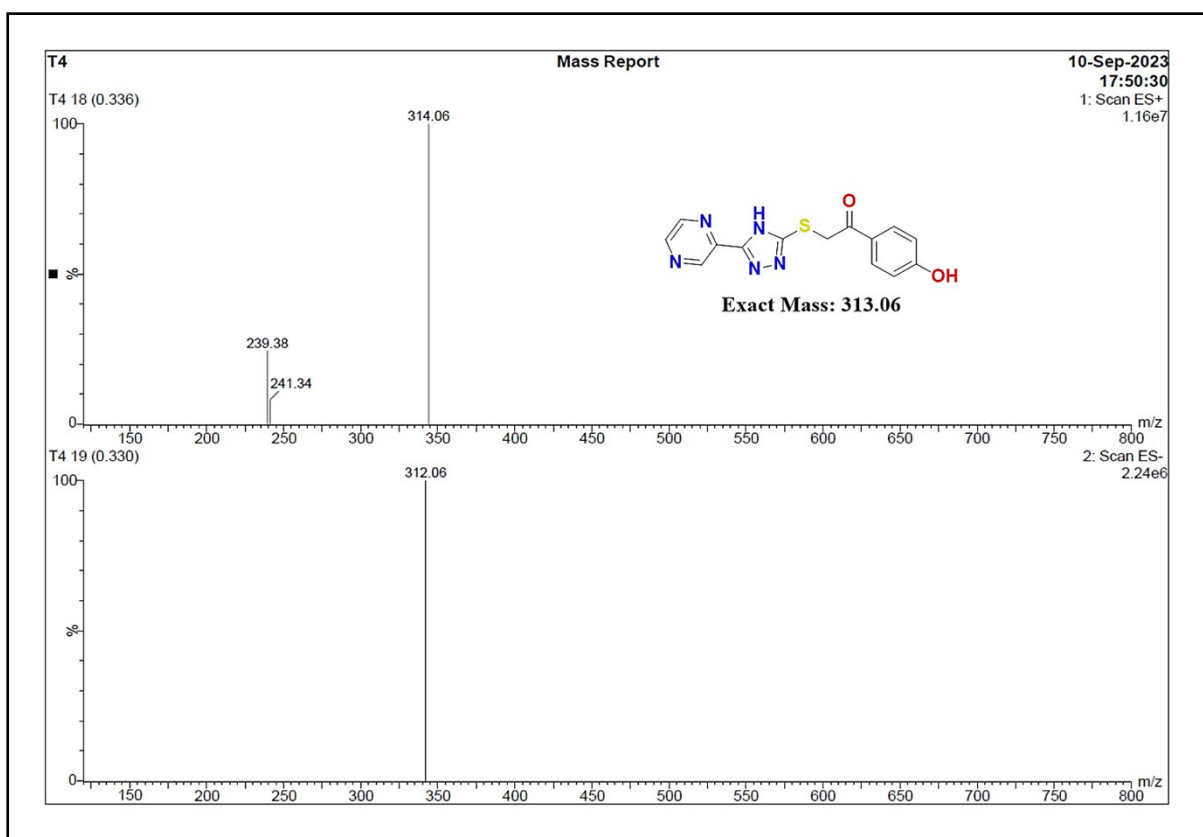

**Figure S44: ESI-MS spectrum of compound T4**

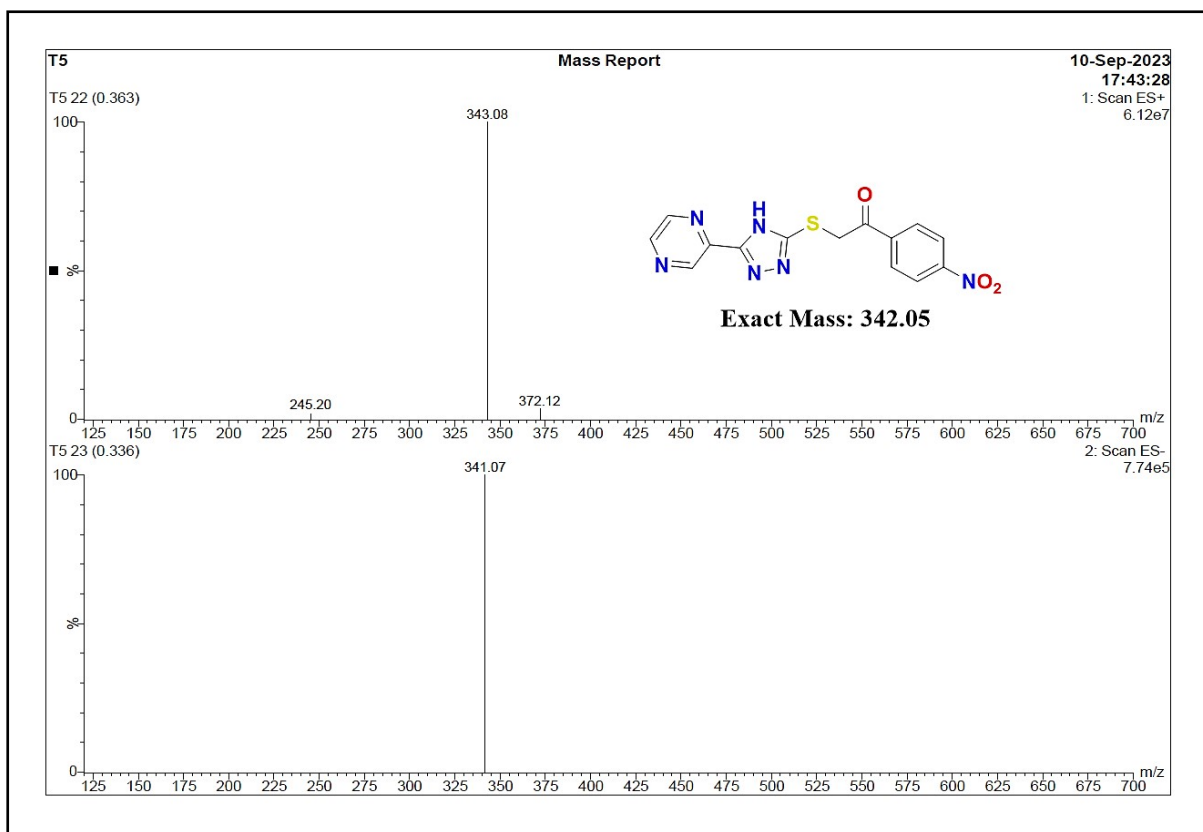

**Figure S45: ESI-MS spectrum of compound T5**

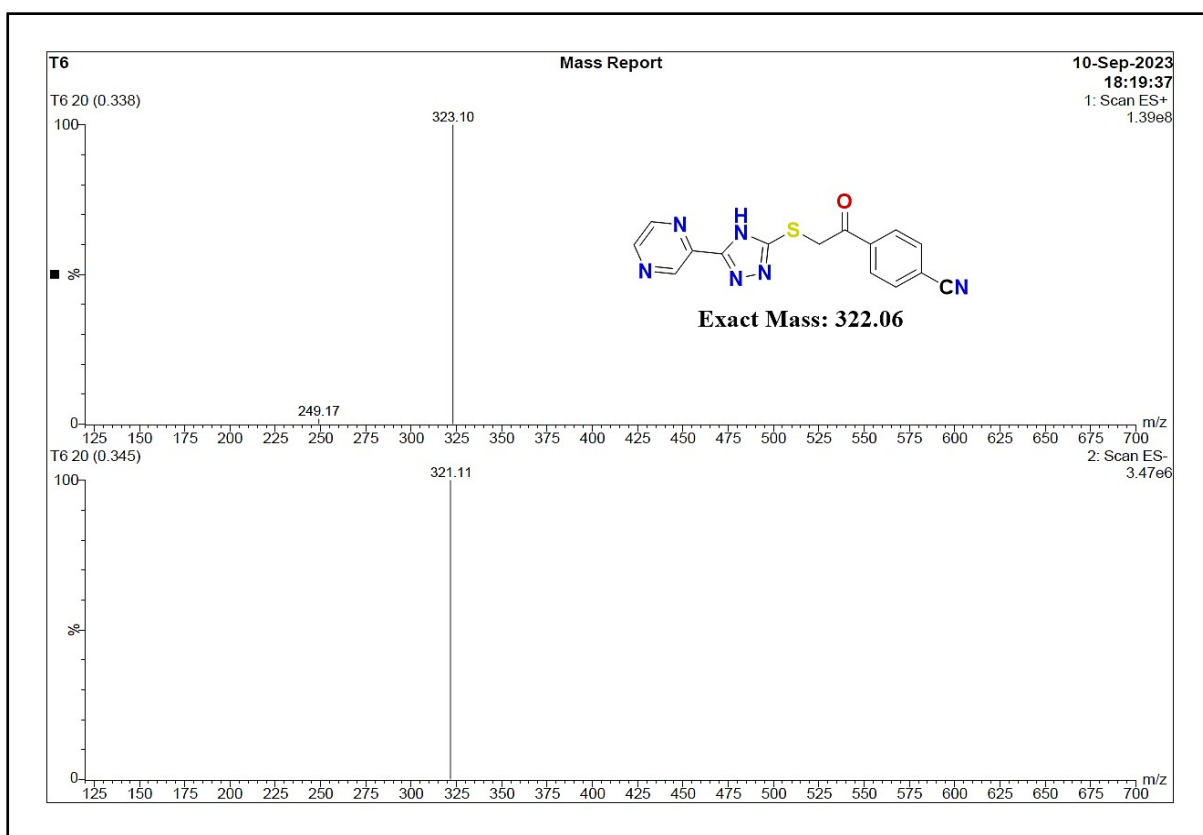

**Figure S46: ESI-MS spectrum of compound T6**

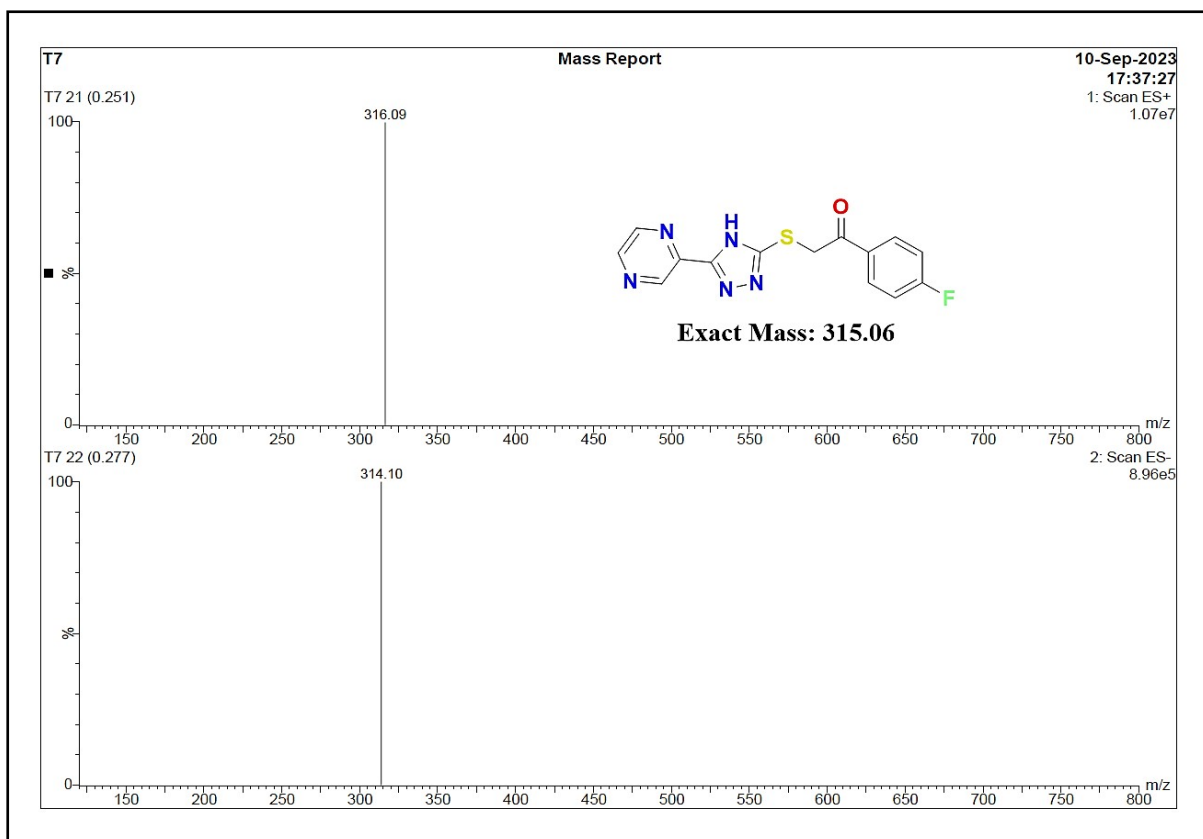

**Figure S47:** ESI-MS spectrum of compound T7

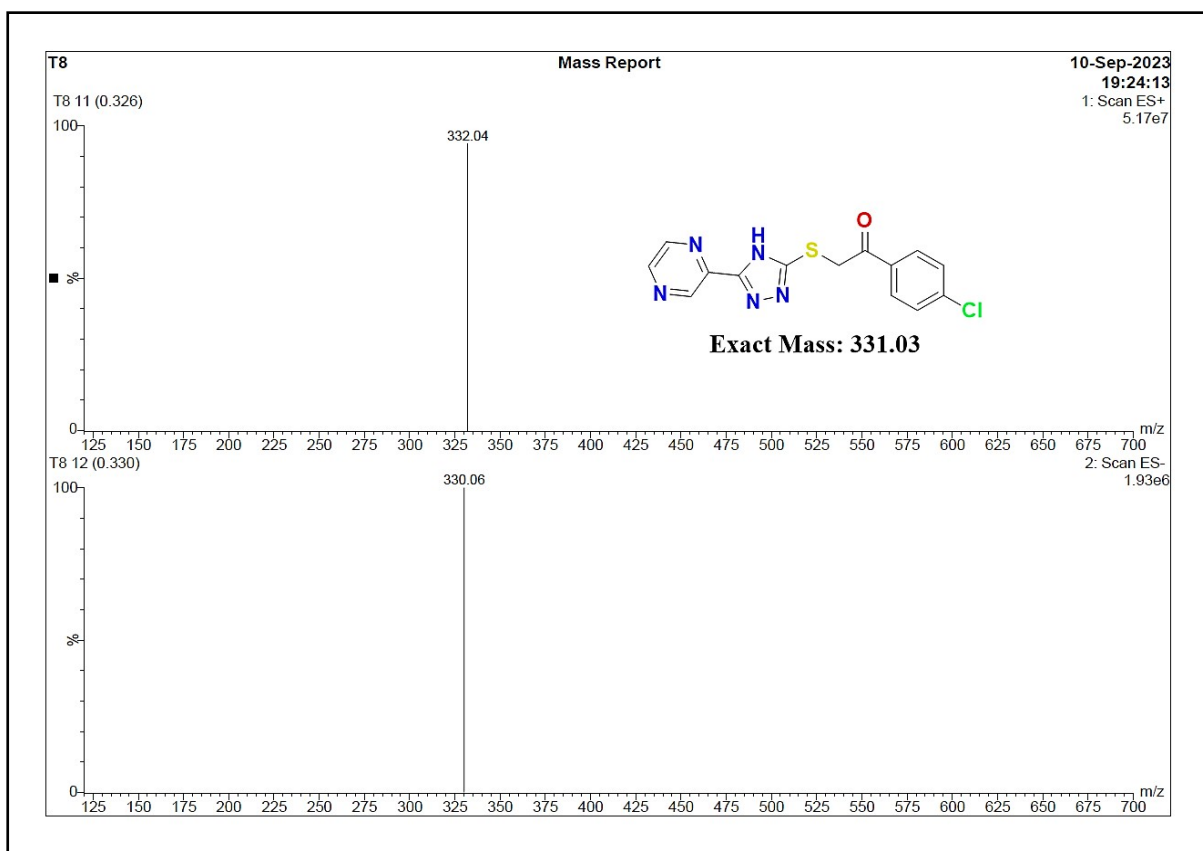

**Figure S48:** ESI-MS spectrum of compound T8



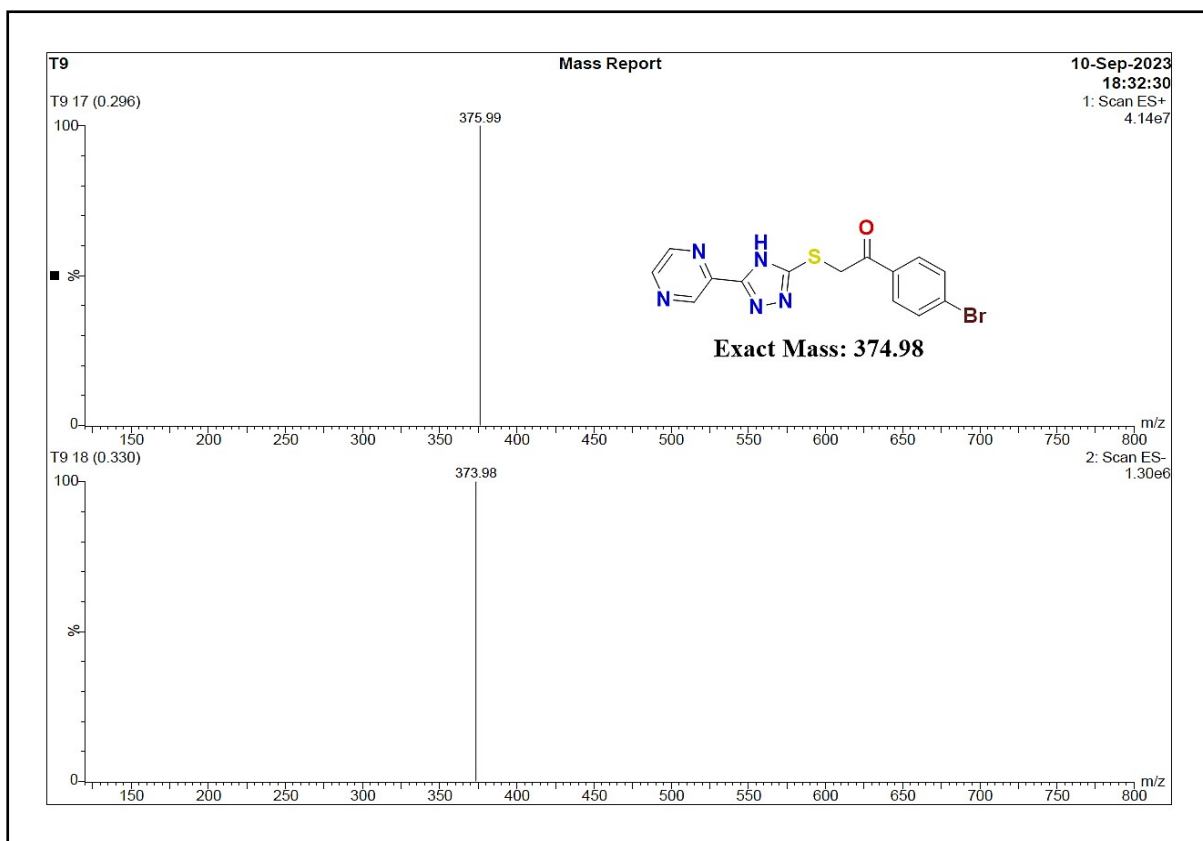

**Figure S49:** ESI-MS spectrum of compound T9

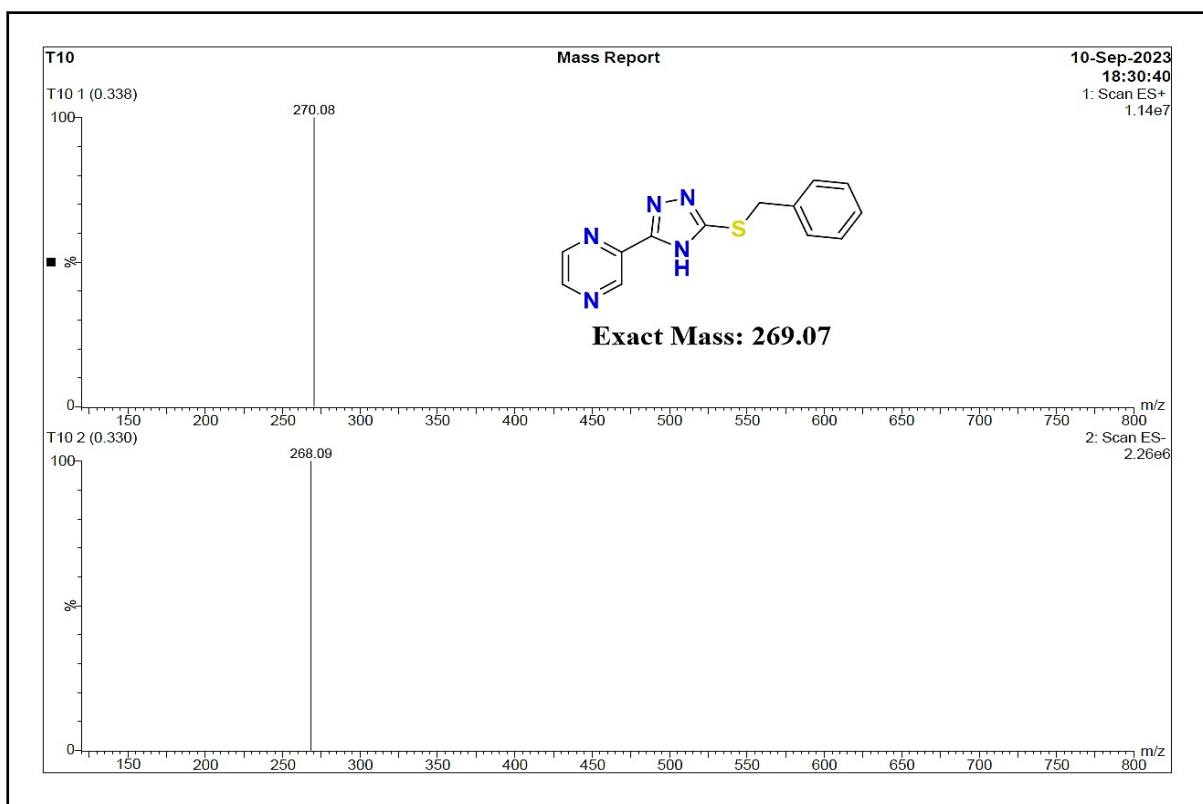

**Figure S50:** ESI-MS spectrum of compound T10

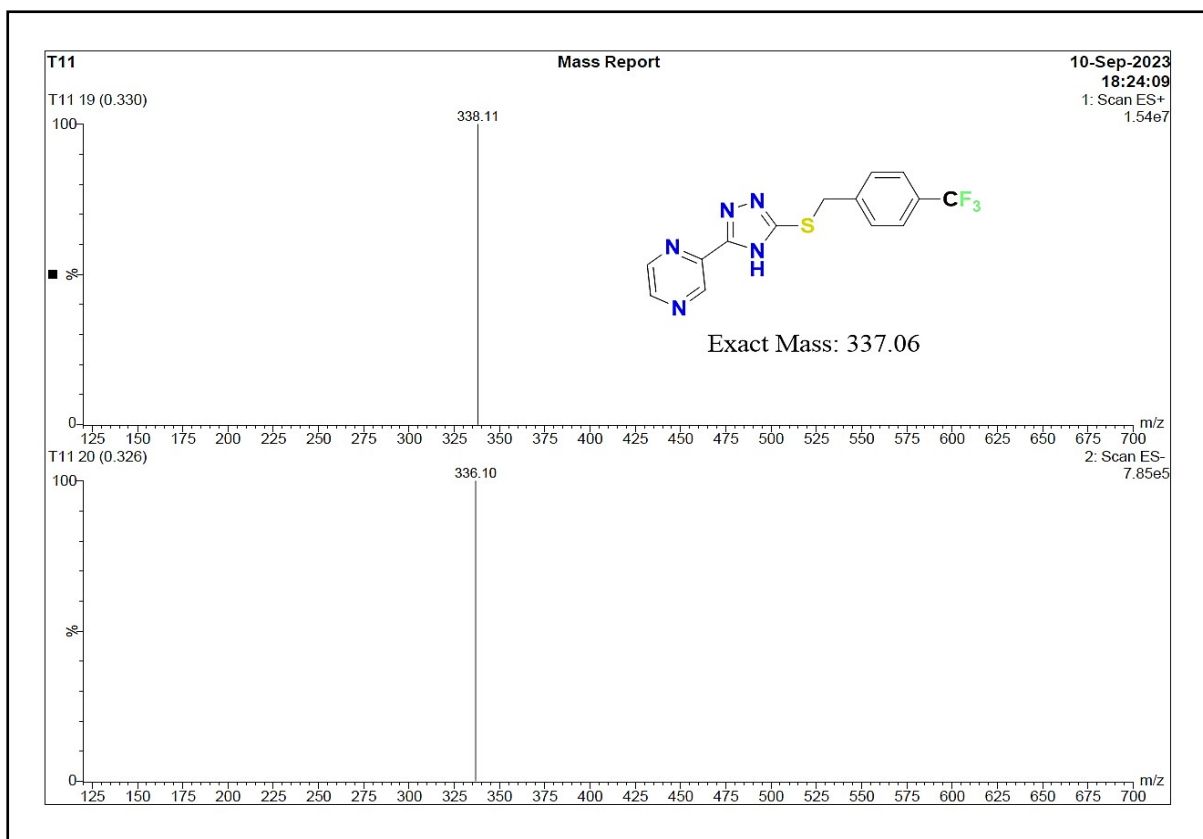

**Figure S51:** ESI-MS spectrum of compound T11

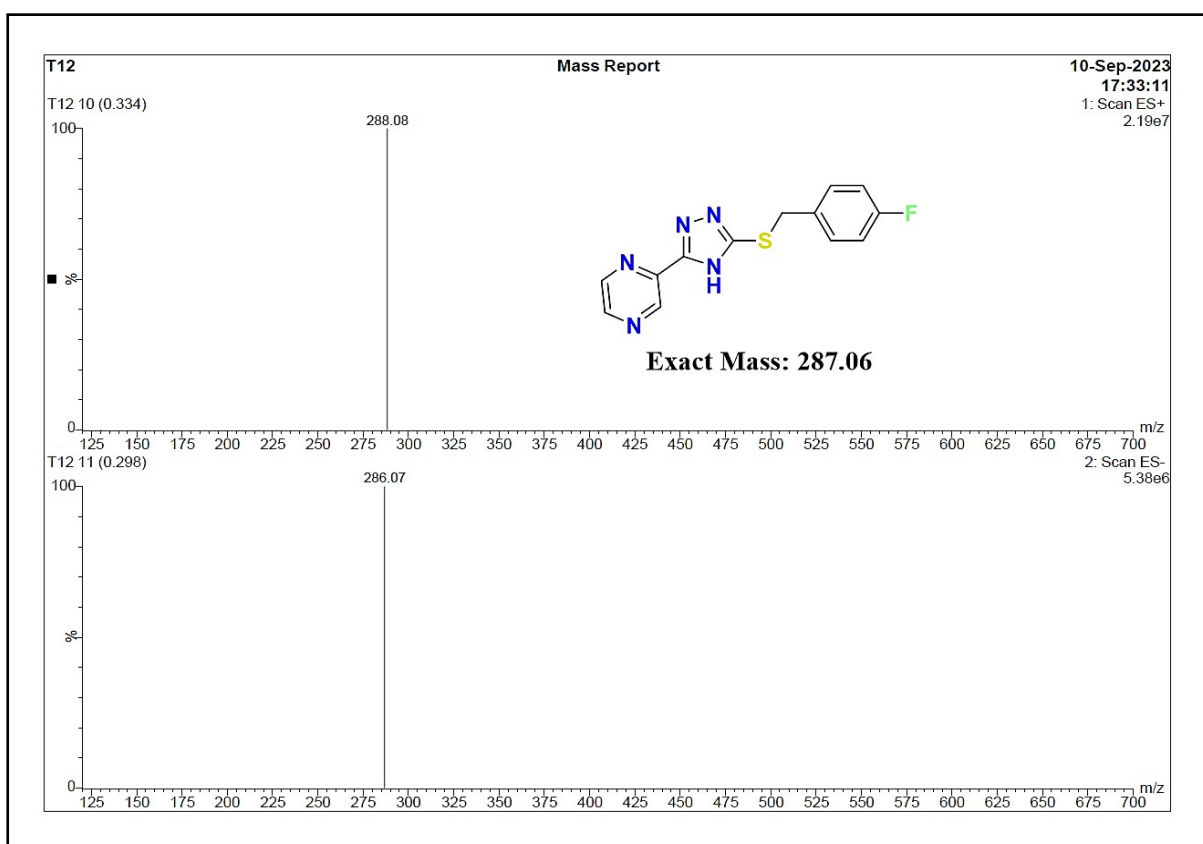

**Figure S52:** ESI-MS spectrum of compound T12

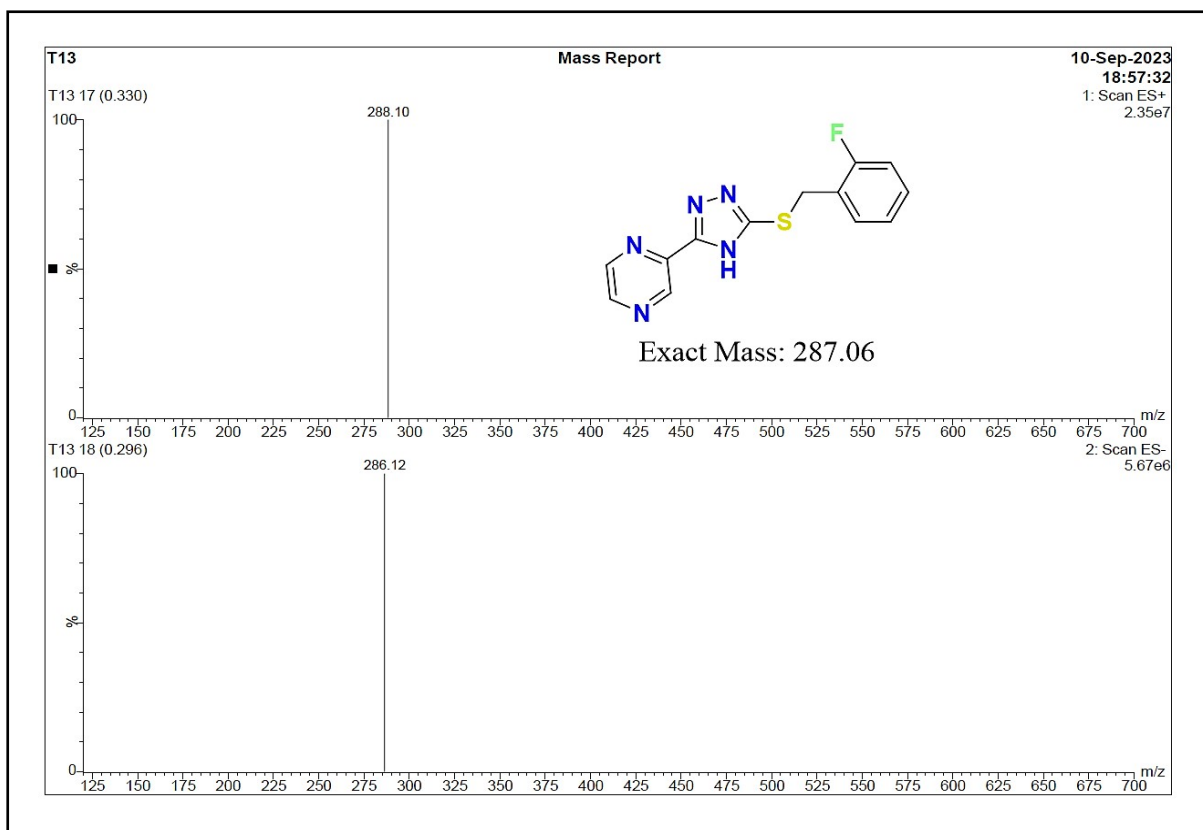

**Figure S53:** ESI-MS spectrum of compound T13

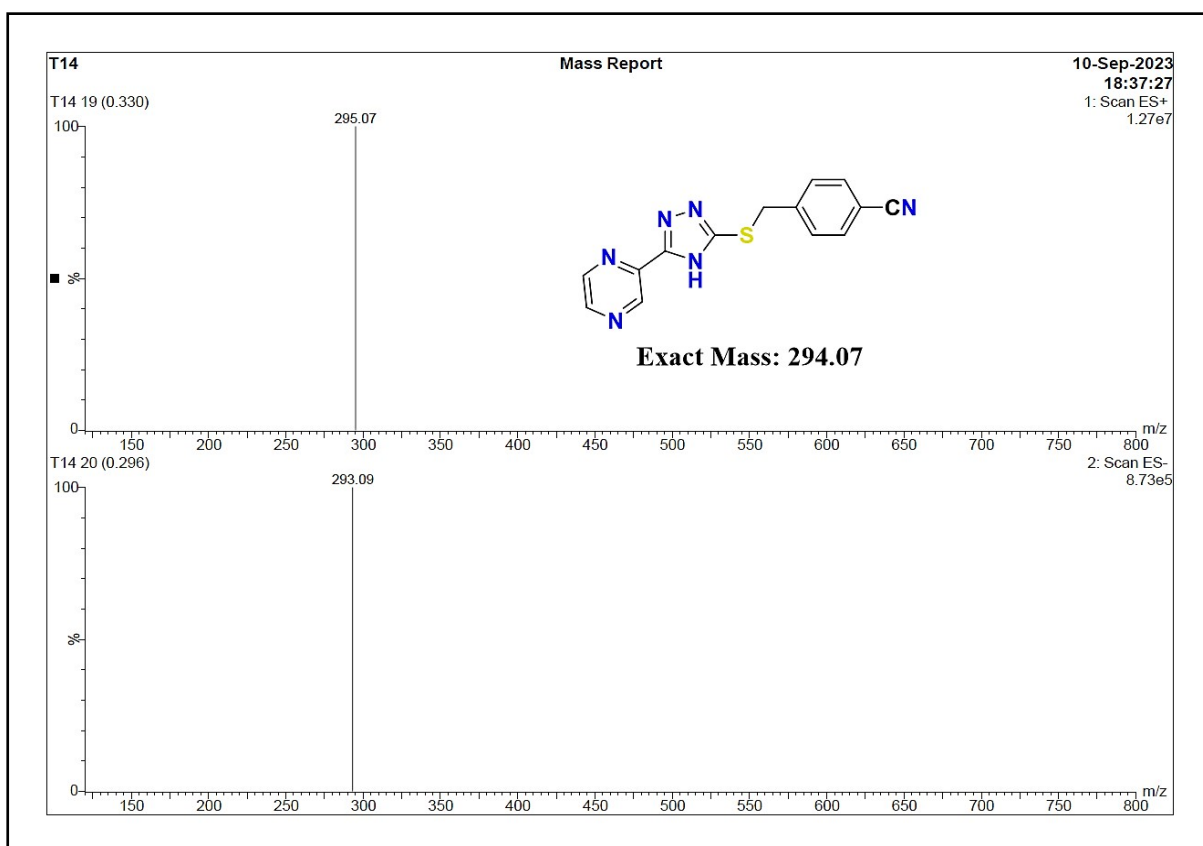

**Figure S54:** ESI-MS spectrum of compound T14

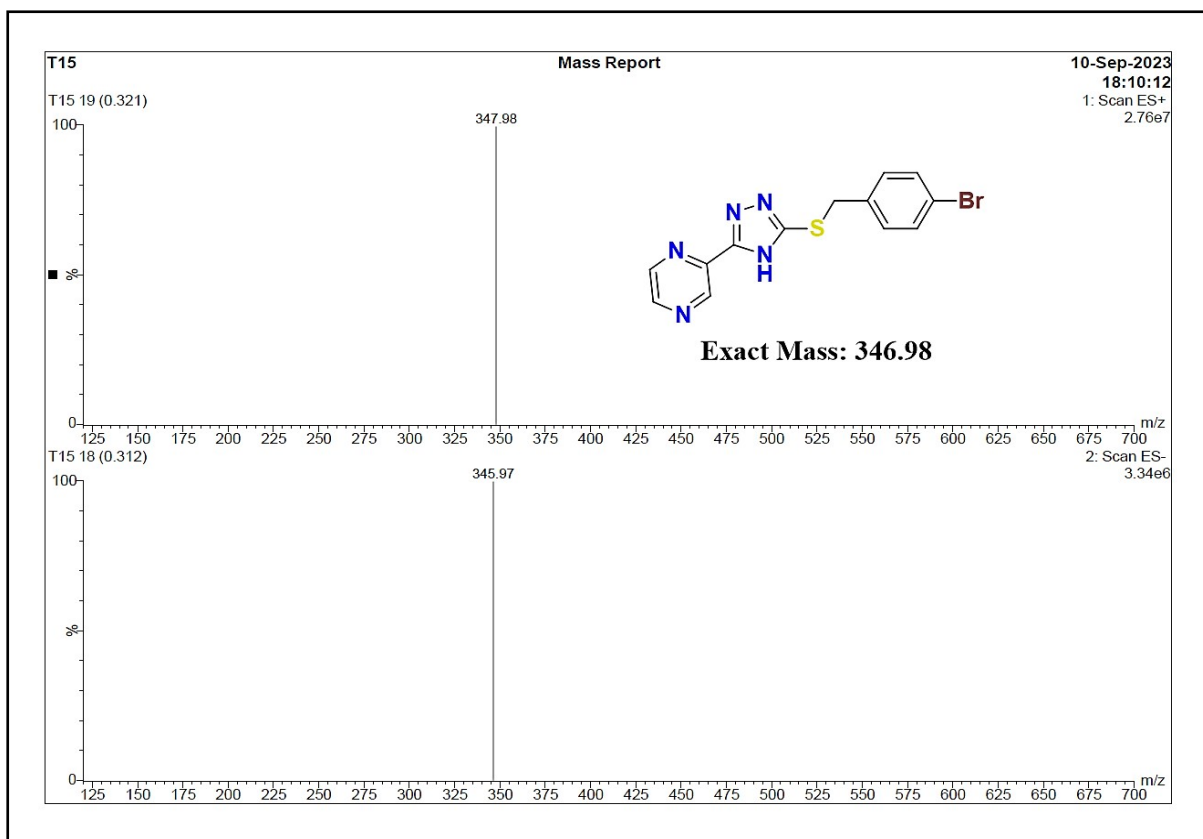

**Figure S55:** ESI-MS spectrum of compound T15

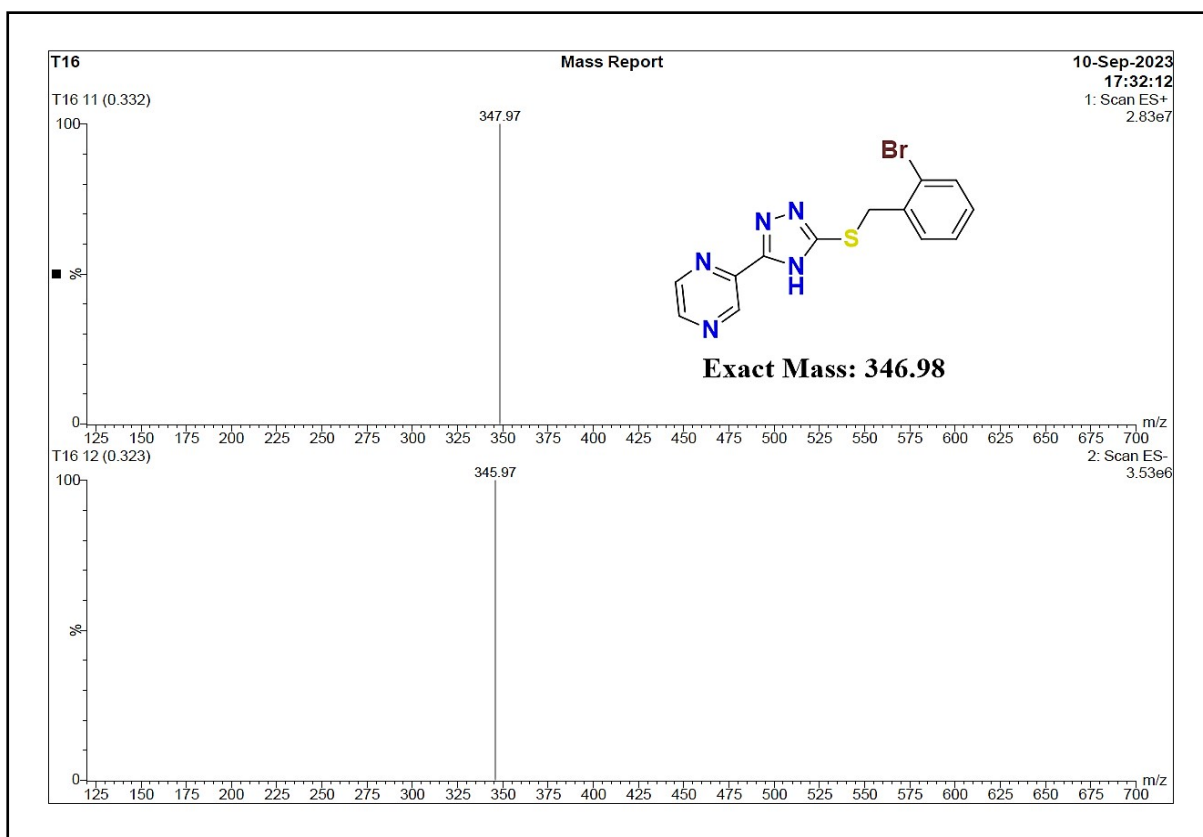

**Figure S56:** ESI-MS spectrum of compound T16

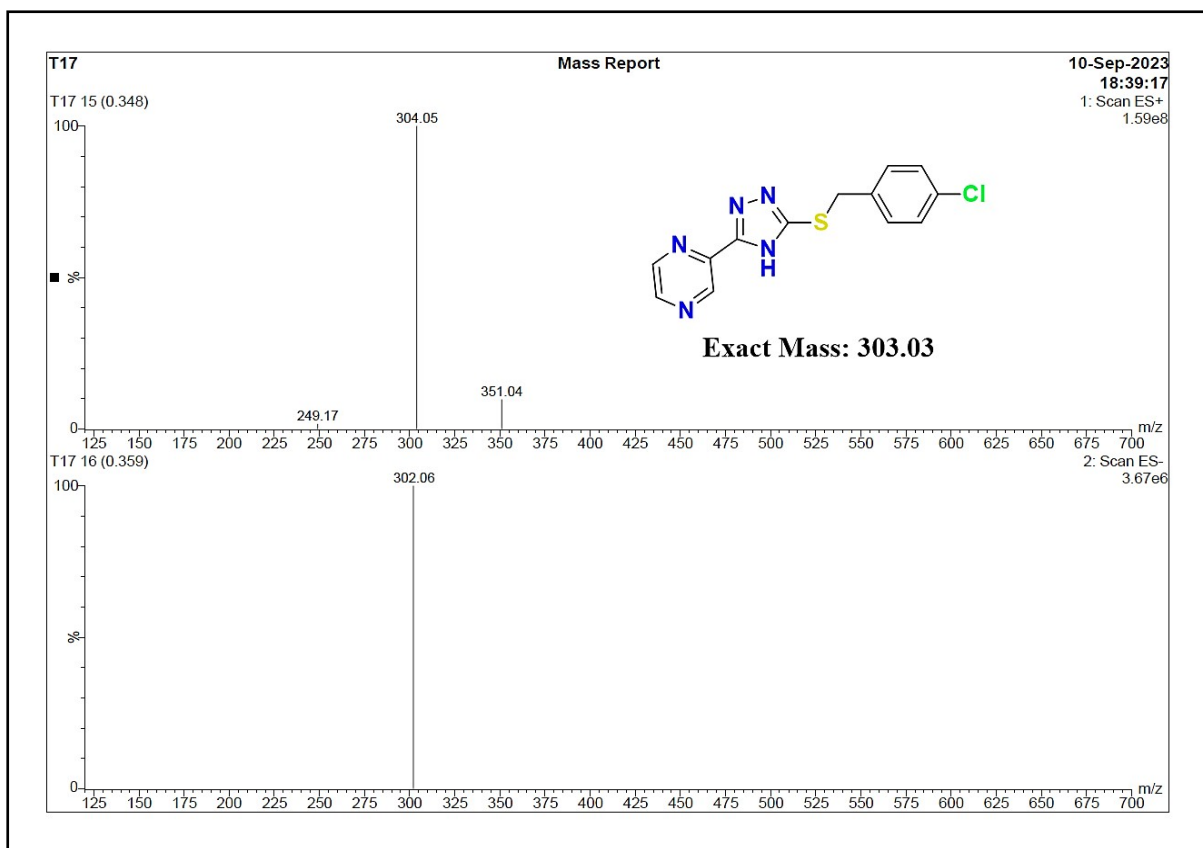

**Figure S57:** ESI-MS spectrum of compound T17

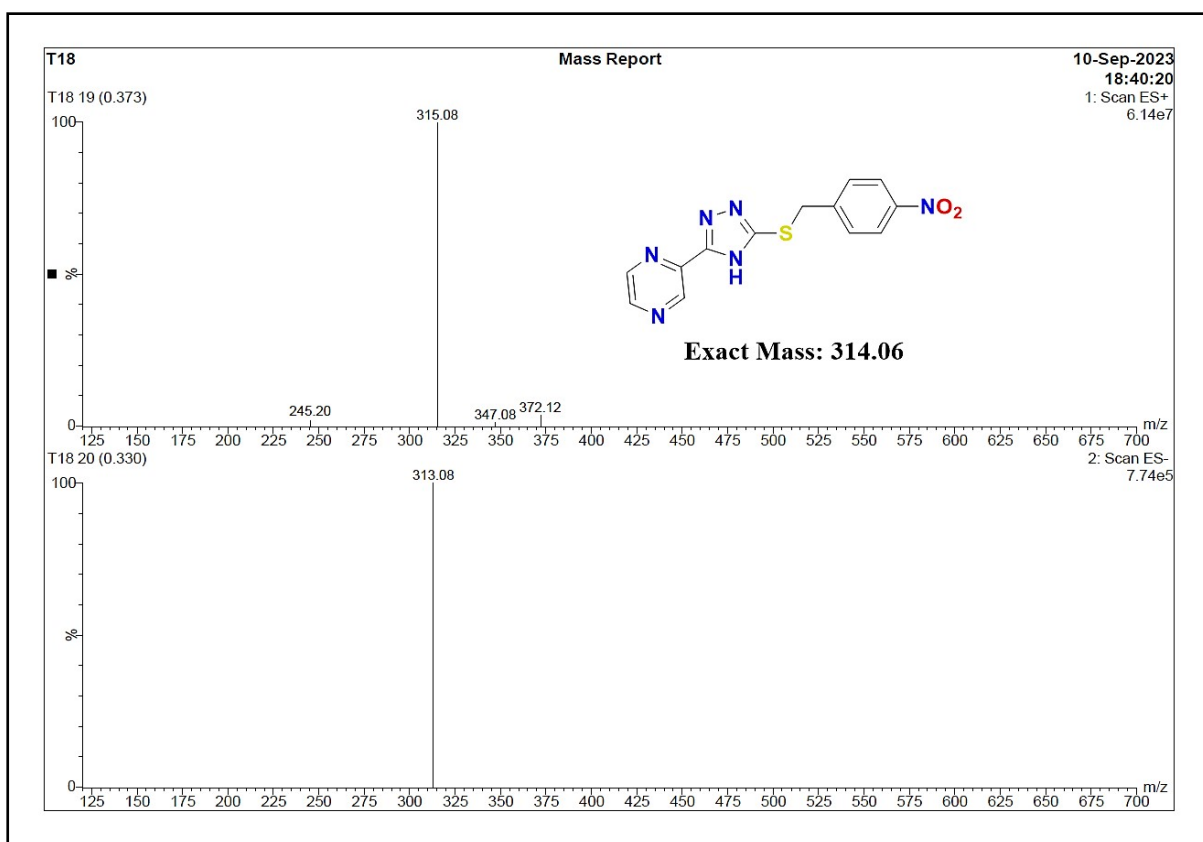

**Figure S58:** ESI-MS spectrum of compound T18



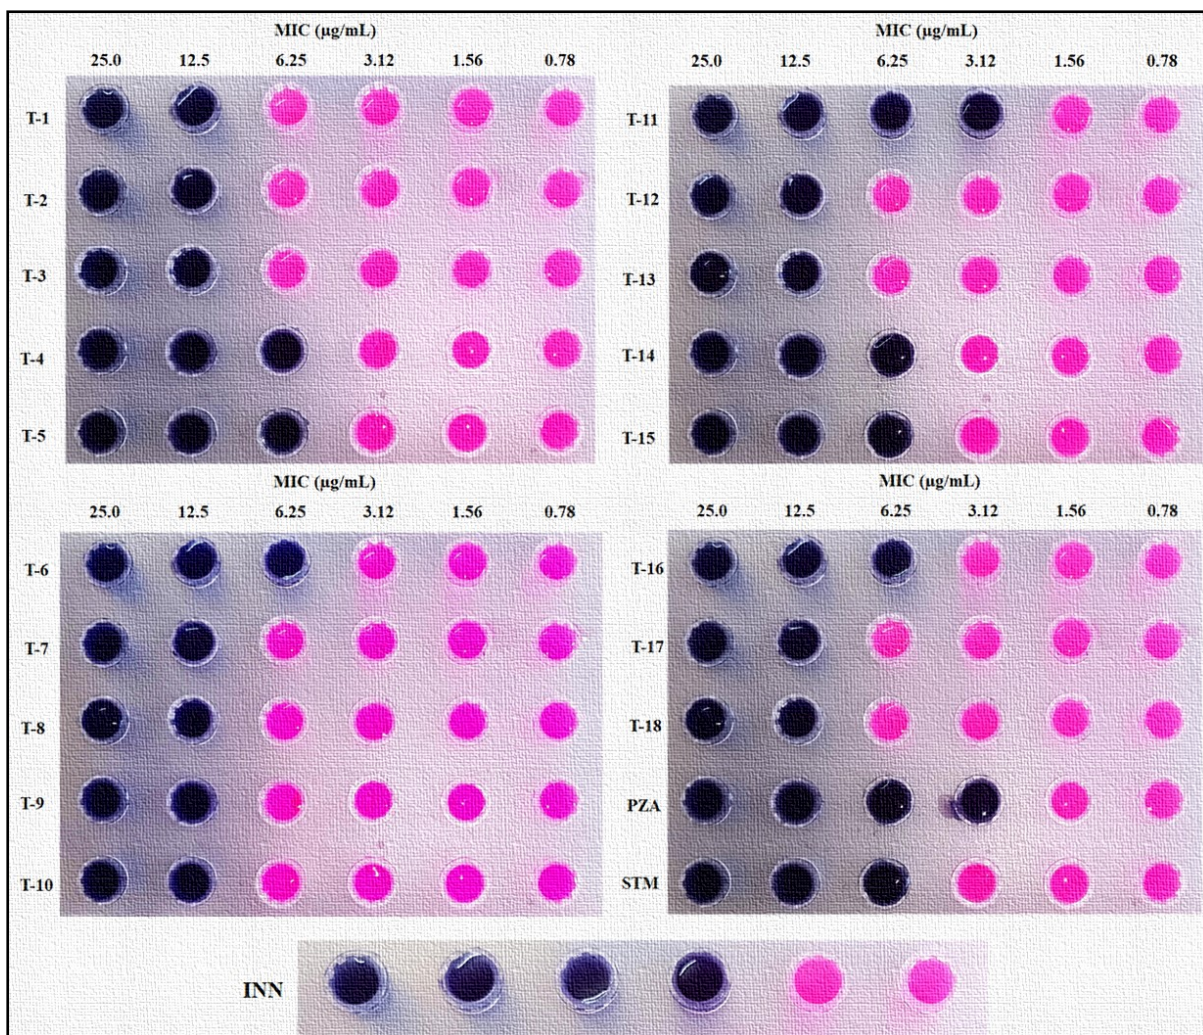

**Figure S59:** *In vitro* antitubercular activity assessment of target compounds (T1-T18)



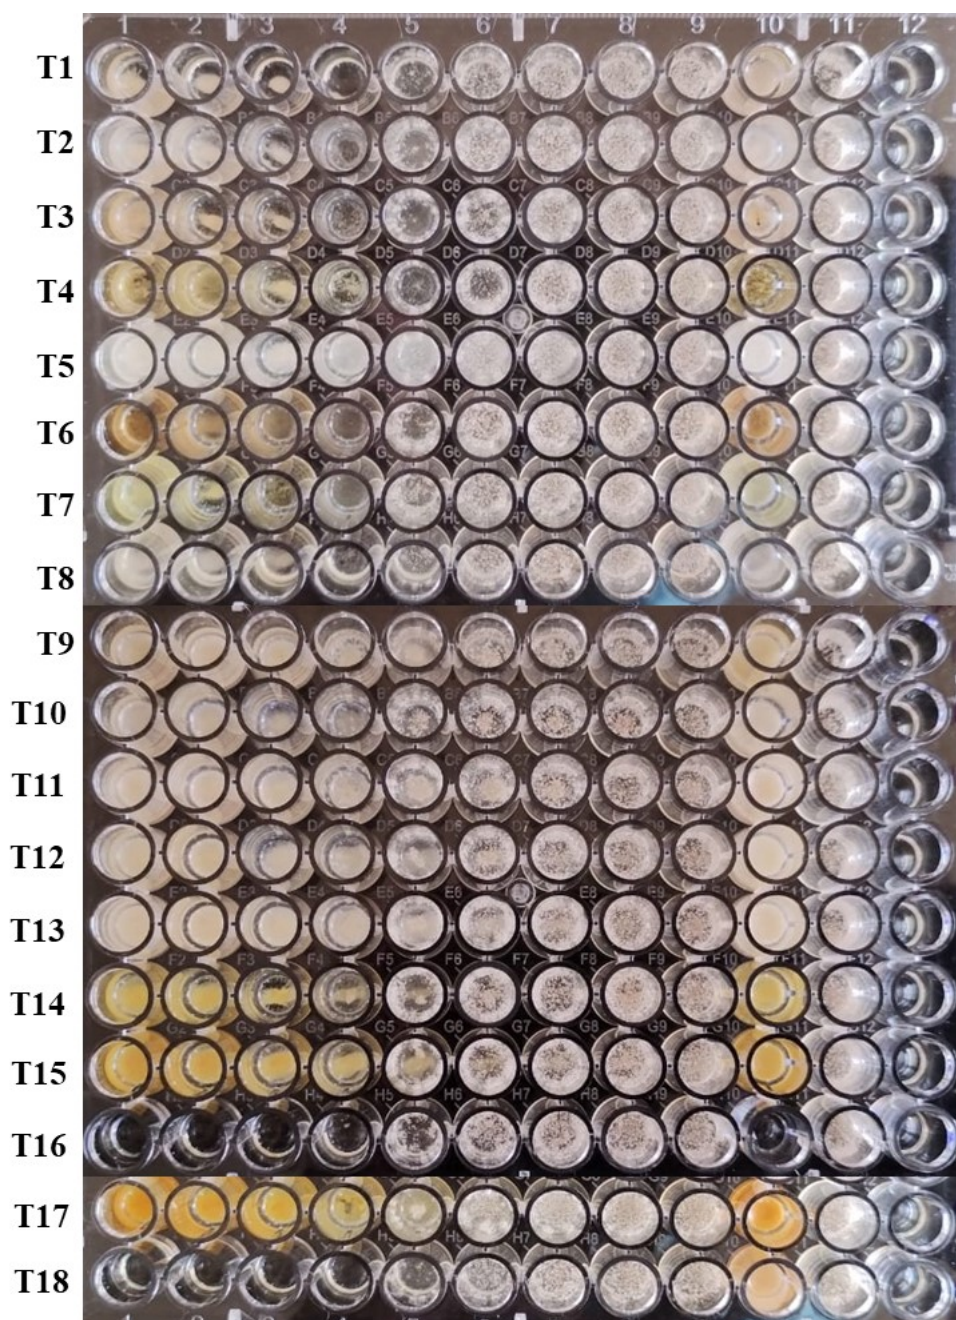

1) 5mg/ml, 2) 2.5mg/ml, 3) 1.25mg/ml, 4) 0.625mg/ml, 5) 0.3125mg/ml, 6) 0.15625mg/ml, 7) 0.078125, 8) 0.039063, 9) 0.01953mg/ml, 10) compound control, 11) culture control, 12) media control

**Figure S60:** *In vitro* antifungal activity assessment of target compounds against *A. niger*



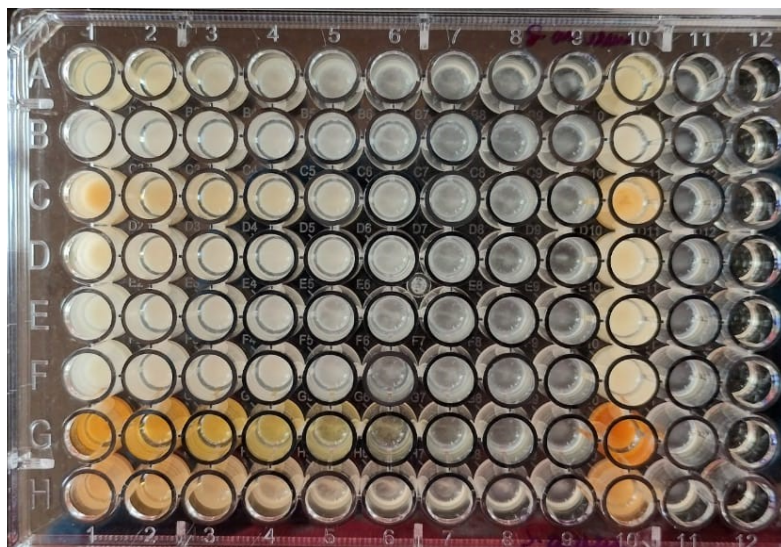

1) 5mg/ml, 2) 2.5mg/ml, 3) 1.25mg/ml, 4) 0.625mg/ml, 5) 0.3125mg/ml, 6) 0.15625mg/ml, 7) 0.078125, 8) 0.039063, 9) 0.01953mg/ml, 10) compound control, 11) culture control, 12) media control A) T1, B) T2, C) T3, D) T4, E) T5, F) T6, G) T7, H) T8

**Figure S61:** *In vitro* antibacterial activity assessment of target compounds against *S. aureus*

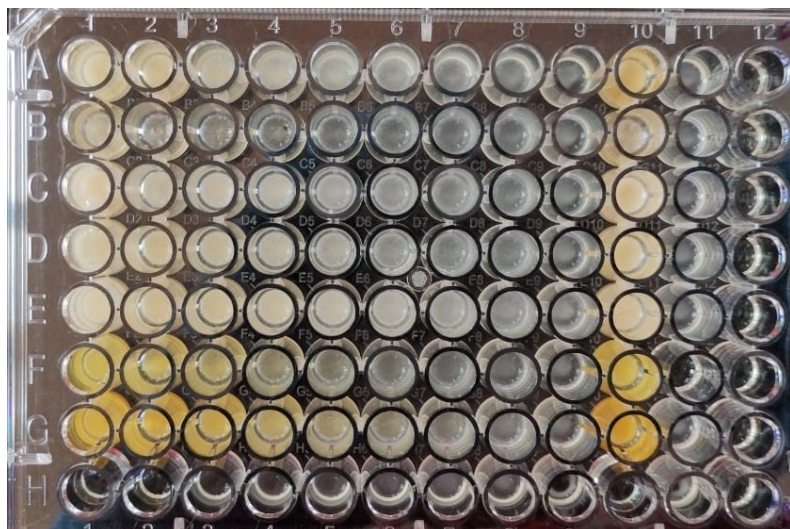

1) 5mg/ml, 2) 2.5mg/ml, 3) 1.25mg/ml, 4) 0.625mg/ml, 5) 0.3125mg/ml, 6) 0.15625mg/ml, 7) 0.078125, 8) 0.039063, 9) 0.01953mg/ml, 10) compound control, 11) culture control, 12) media control A) T9, B) T10, C) T11, D) T12, E) T13, F) T14, G) T15, H) DMSO

**Figure S62:** *In vitro* antibacterial activity assessment of target compounds against *S. aureus*

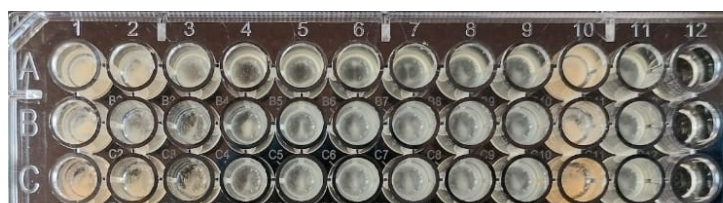

1) 5mg/ml, 2) 2.5mg/ml, 3) 1.25mg/ml, 4) 0.625mg/ml, 5) 0.3125mg/ml, 6) 0.15625mg/ml, 7) 0.078125, 8) 0.039063, 9) 0.01953mg/ml, 10) compound control, 11) culture control, 12) media control A) T16, B) T17, C) T18

**Figure S63:** *In vitro* antibacterial activity assessment of target compounds against *S. aureus*

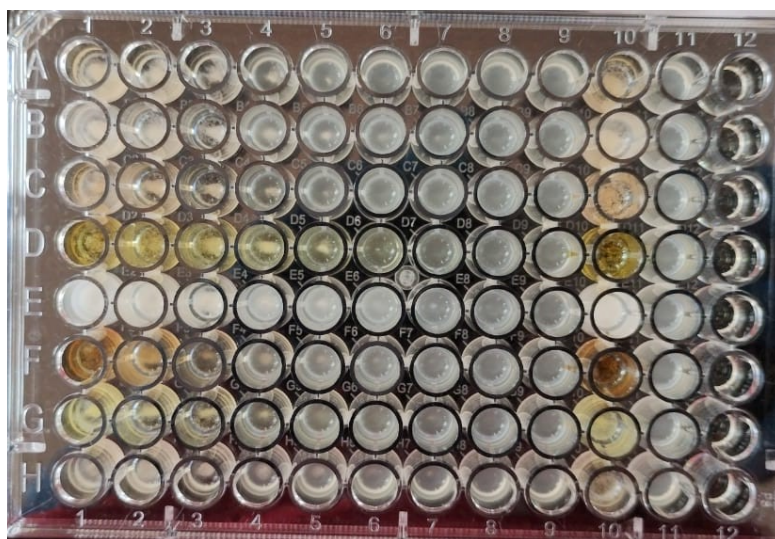

1) 5mg/ml, 2) 2.5mg/ml, 3) 1.25mg/ml, 4) 0.625mg/ml, 5) 0.3125mg/ml, 6) 0.15625mg/ml, 7) 0.078125, 8) 0.039063, 9) 0.01953mg/ml, 10) compound control, 11) culture control, 12) media control A) T1, B) T2, C) T3, D) T4, E) T5, F) T6, G) T7, H) T8

**Figure S64:** *In vitro* antibacterial activity assessment of target compounds against *S. Typhi*

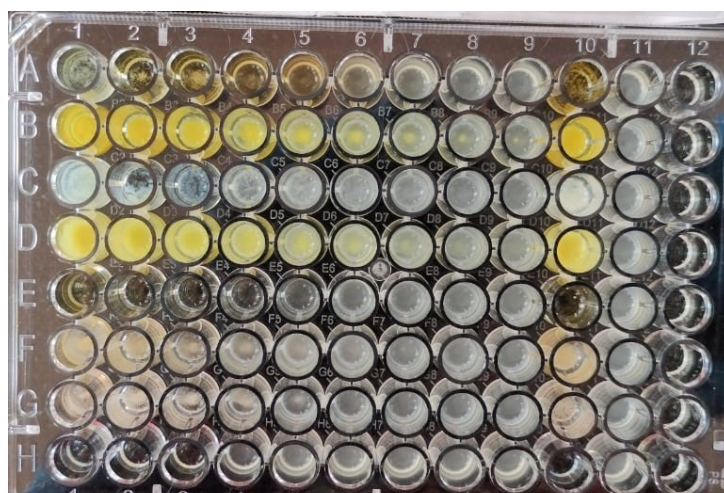

1) 5mg/ml, 2) 2.5mg/ml, 3) 1.25mg/ml, 4) 0.625mg/ml, 5) 0.3125mg/ml, 6) 0.15625mg/ml, 7) 0.078125, 8) 0.039063, 9) 0.01953mg/ml, 10) compound control, 11) culture control, 12) media control A) T9, B) T10, C) T11, D) T12, E) T13, F) T14, G) T15, H) DMSO

**Figure S65:** *In vitro* antibacterial activity assessment of target compounds against *S. Typhi*

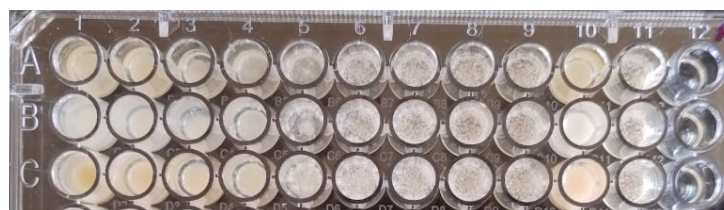

1) 5mg/ml, 2) 2.5mg/ml, 3) 1.25mg/ml, 4) 0.625mg/ml, 5) 0.3125mg/ml, 6) 0.15625mg/ml, 7) 0.078125, 8) 0.039063, 9) 0.01953mg/ml, 10) compound control, 11) culture control, 12) media control A) T16, B) T17, C) T18

**Figure S66:** *In vitro* antibacterial activity assessment of target compounds against *S. Typhi*



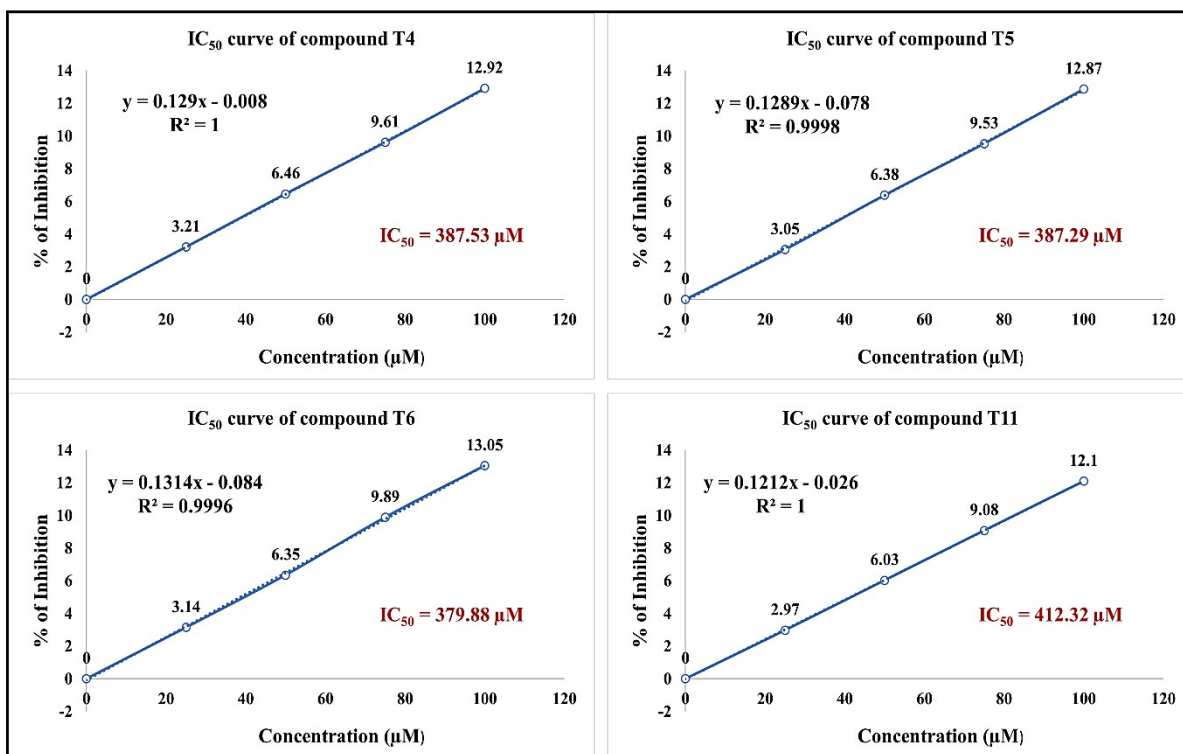

**Figure S67:** Graphical illustration of IC<sub>50</sub> value of the compound T4. T5, T6, & T11 were determined through an MTT assay against the Vero cell line

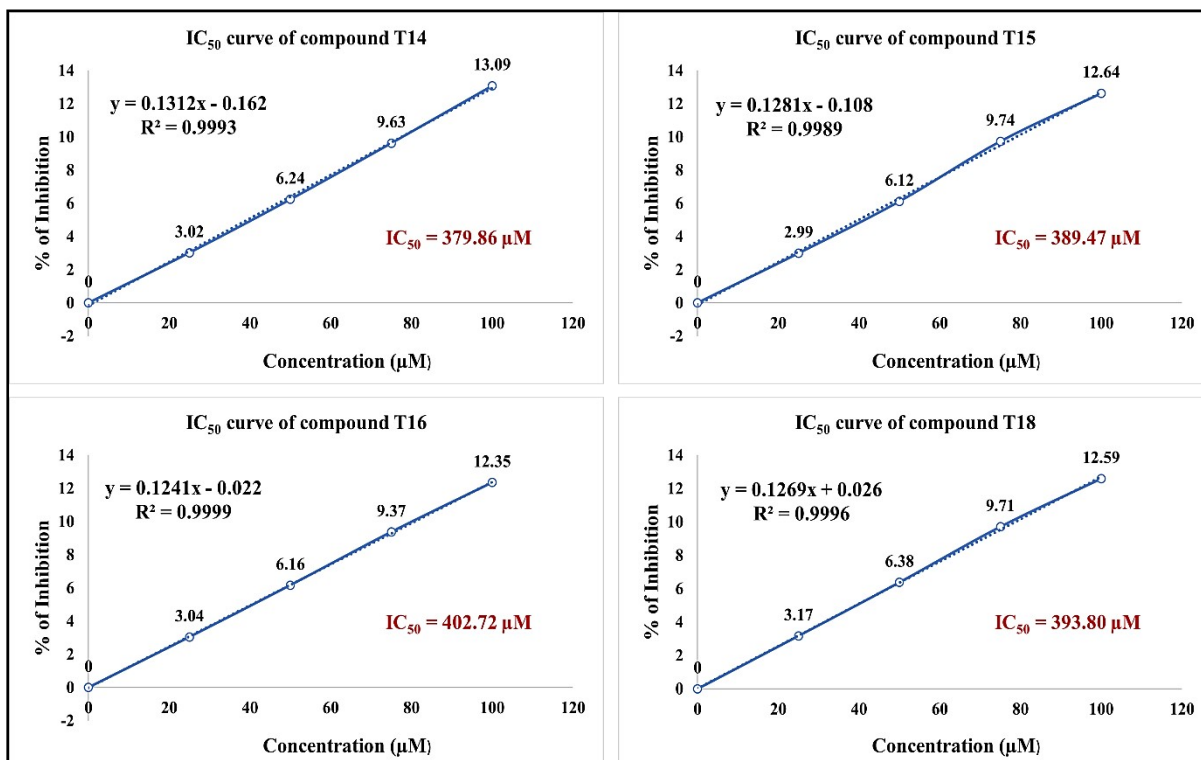

**Figure S68:** Graphical illustration of IC<sub>50</sub> value of the compound T14. T15, T16, & T18 were determined through an MTT assay against the Vero cell line
